# Supplementary material for: Transition metal-free C(sp3)–H bond coupling among three methyl groups
Source: Royal Society of Chemistry journal article supplement (doi:10.1039/c7cc01309d), 2017-01-01

## *Supporting Information*

### **Transition Metal-Free $\text{sp}^3\text{C-H}$ Bond Coupling among Three Methyl Groups**

Yufeng Liu, Xi Zhan, Pengyi Ji, Jingwen Xu, Qiang Liu, Weiping Luo, Tieqiao Chen  
and Cancheng Guo\*

College of Chemistry and Chemical Engineering, Advanced Catalytic Engineering  
Research Center of the Ministry of Education, Hunan University, Changsha 410082,  
China

E-mail: ccguo@hnu.edu.cn

### **Table of Contents**

|                                           |            |
|-------------------------------------------|------------|
| <b>General information</b> .....          | <b>S2</b>  |
| <b>General procedures</b> .....           | <b>S2</b>  |
| <b>Spectra Data of the Products</b> ..... | <b>S3</b>  |
| <b>NMR Spectra</b> .....                  | <b>S11</b> |

## I. General Information

Except noted otherwise, all reactions were carried out in Schlenk tubes. Reagents and solvents were obtained from commercial sources and used without further purification. The  $^1\text{H}$  and  $^{13}\text{C}$  spectra were recorded on a Bruker ADVANCE III spectrometer at 400 MHz and 100 MHz, and chemical shifts were reported in parts per million (ppm). Flash column chromatography was performed using silica gel of 300-400  $\mu\text{m}$ . The GC-MS results were recorded on a GC-MS QP2010 equipment, GC analysis was performed on GC 2010 Plus. The electron ionization (EI) method was used for HRMS measurement, and the mass analyzer type is TOF for EI. The HRMS (EI) was recorded on an Esquire 3000 plus instrument.

## II. General Procedures

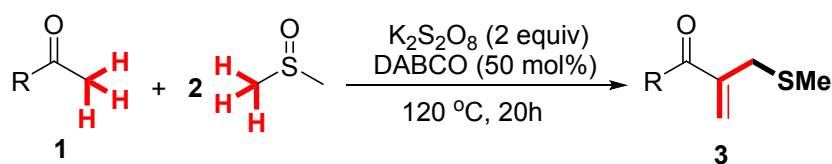

In a Schlenk tube of 25 mL, DABCO (0.1 mmol, 50 mol%) and acetophenone **1** (0.2 mmol, 1.0 equiv) were dissolved in DMSO (1.2 mL) and stirred at room temperature for 1 minutes. Then K<sub>2</sub>S<sub>2</sub>O<sub>8</sub> (0.4 mmol, 2 equiv) were added. The mixture was stirred at 120 °C for 20 h under N<sub>2</sub> atmosphere. After completion of the reaction, the resulting solution was cooled to room temperature; the solution was diluted with ethyl acetate (10 mL), washed with water (5 mL), extracted with ethyl acetate (3×5 mL), and dried over anhydrous Na<sub>2</sub>SO<sub>4</sub> and concentrated in vacuo. The crude product was purified by flash column chromatography on silica gel to give the desired product.

### Gram scale synthesis

A round-bottomed of 250 mL flask equipped with a magnetic stir bar (20 mm) was charged with DABCO (5 mmol, 50 mol%) and ortho-hydroxyacetophenone (**1x**, 10 mmol) were dissolved in DMSO (60 mL) and stirred at room temperature for 1 minutes. Then K<sub>2</sub>S<sub>2</sub>O<sub>8</sub> (20 mmol, 2 equiv) were added. The mixture was stirred at 120

°C for 35 h under N<sub>2</sub> atmosphere. After completion of the reaction, the resulting solution was cooled to room temperature; the solution was diluted with ethyl acetate (30 mL), washed with water (30 mL), extracted with ethyl acetate (3×30 mL), and dried over anhydrous Na<sub>2</sub>SO<sub>4</sub> and concentrated in vacuo. The crude product was purified by flash column chromatography on silica gel to give the desired product **3x** in 68% yield (1414mg).

### III. Spectra Data of the Products

#### 2-(methylthiomethyl)-1-phenylprop-2-en-1-one (**3a**)

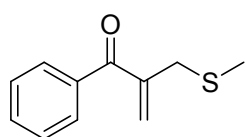

Prepared according to the general procedure to afford a yellow oil in 88% yield. <sup>1</sup>H NMR (400 MHz, CDCl<sub>3</sub>) δ 7.78 (d, J = 7.5 Hz, 2H), 7.56 (t, J = 7.4 Hz, 1H), 7.45 (t, J = 7.5 Hz, 2H), 5.92 (s, 1H), 5.68 (s, 1H), 3.54 (s, 2H), 2.13 (s, 3H); <sup>13</sup>C NMR (100 MHz, CDCl<sub>3</sub>) δ 197.0, 143.7, 137.5, 132.5, 129.5, 128.3, 126.0, 35.3, 15.5. HRMS (EI): calcd for C<sub>11</sub>H<sub>12</sub>OS: 192.0609; found: 192.0602.

#### 2-(methylthiomethyl)-1-(p-tolyl)prop-2-en-1-one (**3b**)

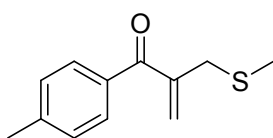

Following the general procedure to afford a yellow oil in 89% yield. <sup>1</sup>H NMR (400 MHz, CDCl<sub>3</sub>) δ 7.70 (d, J = 7.7 Hz, 2H), 7.25 (d, J = 8.1 Hz, 2H), 5.87 (s, 1H), 5.64 (s, 1H), 3.53 (s, 2H), 2.42 (s, 3H), 2.12 (s, 3H); <sup>13</sup>C NMR (100 Hz, CDCl<sub>3</sub>) δ 196.7, 143.9, 143.3, 134.8, 129.7, 129.0, 125.1, 100.0, 35.5, 21.6, 15.5. HRMS (EI): calcd for C<sub>12</sub>H<sub>14</sub>OS: 206.0765; found: 206.0761.

#### 2-(methylthiomethyl)-1-(m-tolyl)prop-2-en-1-one (**3c**)

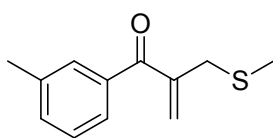

Following the general procedure to afford a yellow oil in 78% yield. <sup>1</sup>H NMR (400 MHz, CDCl<sub>3</sub>) δ 7.58 (s, 1H), 7.55 (d, J = 7.3 Hz, 1H), 7.37 (d, J = 7.3 Hz, 1H), 7.33 (t, J = 14.8 Hz, 1H), 5.91 (s, 1H), 5.67 (s, 1H), 3.53 (s, 2H), 2.41 (s, 3H), 2.13 (s, 3H); <sup>13</sup>C NMR (100 MHz, CDCl<sub>3</sub>) δ 197.2, 143.9, 138.1, 137.5, 133.2, 129.9, 128.1, 126.8, 125.8, 35.3, 21.3, 15.5. HRMS (EI): calcd for C<sub>12</sub>H<sub>14</sub>OS: 206.0765; found: 206.0757.

### 1-(4-isopropylphenyl)-2-(methylthiomethyl)prop-2-en-1-one (3d)

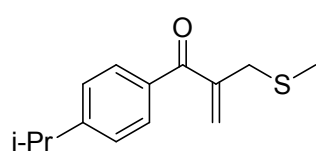

Following the general procedure to afford a yellow oil in 86% yield. **<sup>1</sup>H NMR** (400 MHz, CDCl<sub>3</sub>) δ 7.74 (d, J = 8.0 Hz, 2H), 7.30 (d, J = 8.0 Hz, 2H), 5.87 (s, 1H), 5.66 (s, 1H), 3.53 (s, 2H), 2.97 (dt, J = 13.8, 6.9 Hz, 1H), 2.12 (s, 3H), 1.28 (s, 3H), 1.27 (s, 3H); **<sup>13</sup>C NMR** (100 MHz, CDCl<sub>3</sub>) δ 196.7, 154.1, 143.9, 135.1, 129.9, 126.4, 125.0, 35.5, 34.2, 23.7, 15.5. **HRMS (EI)**: calcd for C<sub>14</sub>H<sub>18</sub>OS: 234.1078; found: 234.1076.

### 1-(4-(tert-butyl)phenyl)-2-(methylthiomethyl)prop-2-en-1-one (3e)

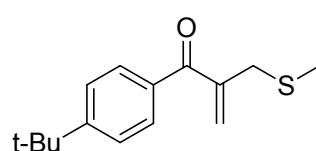

Following the general procedure to afford a yellow oil in 90% yield. **<sup>1</sup>H NMR** (400 MHz, CDCl<sub>3</sub>) δ 7.75 (d, J = 8.3 Hz, 2H), 7.47 (d, J = 8.3 Hz, 2H), 5.87 (s, 1H), 5.66 (s, 1H), 3.53 (s, 2H), 2.12 (s, 3H), 1.34 (s, 9H); **<sup>13</sup>C NMR** (100 MHz, CDCl<sub>3</sub>) δ 196.6, 156.3, 143.8, 134.7, 129.6, 125.2, 125.1, 35.5, 35.0, 31.1, 15.4. **HRMS (EI)**: calcd for C<sub>15</sub>H<sub>20</sub>OS: 248.1235; found: 248.1231.

### 1-(4-methoxyphenyl)-2-(methylthiomethyl)prop-2-en-1-one (3f)

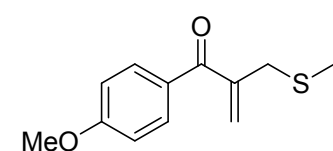

Following the general procedure to afford a yellow oil in 85% yield. **<sup>1</sup>H NMR** (400 MHz, CDCl<sub>3</sub>) δ 7.83 (d, J = 7.7 Hz, 2H), 6.94 (d, J = 7.7 Hz, 2H), 5.82 (s, 1H), 5.60 (s, 1H), 3.87 (s, 3H), 3.54 (s, 2H), 2.13 (s, 3H); **<sup>13</sup>C NMR** (100 MHz, CDCl<sub>3</sub>) δ 195.7, 163.3, 143.9, 132.0, 130.0, 123.9, 113.6, 55.5, 35.8, 15.5. **HRMS (EI)**: calcd for C<sub>12</sub>H<sub>14</sub>O<sub>2</sub>S: 222.0715; found: 222.0706.

### 1-(4-ethoxyphenyl)-2-(methylthiomethyl)prop-2-en-1-one (3g)

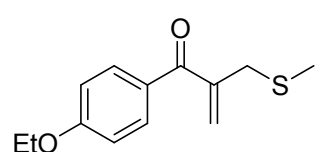

Following the general procedure to afford a yellow oil in 88% yield. **<sup>1</sup>H NMR** (400 MHz, CDCl<sub>3</sub>) δ 7.83 (d, J = 7.7 Hz, 2H), 6.94 (d, J = 7.7 Hz, 2H), 5.82 (s, 1H), 5.60 (s, 1H), 3.87 (s, 3H), 3.54 (s, 2H), 2.13 (s, 3H); **<sup>13</sup>C NMR** (100 MHz, CDCl<sub>3</sub>) δ 195.7, 163.3, 143.9, 132.0, 130.0, 123.9, 113.6, 55.5, 35.8, 15.5. **HRMS (EI)**: calcd for C<sub>13</sub>H<sub>16</sub>O<sub>2</sub>S: 236.0871; found: 236.0864.

### 1-(3,4-dimethoxyphenyl)-2-(methylthiomethyl)prop-2-en-1-one (3h)

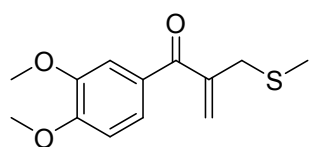

Following the general procedure to afford a yellow oil in 81% yield. **<sup>1</sup>H NMR** (400 MHz, CDCl<sub>3</sub>) δ 7.48-7.43 (m, 2H), 6.89 (d, *J* = 8.2 Hz, 1H), 5.82 (s, 1H), 5.61 (s, 1H), 3.95 (s, 3H), 3.94 (s, 3H), 3.54 (s, 2H), 2.12 (s, 3H); **<sup>13</sup>C NMR** (100 MHz, CDCl<sub>3</sub>) δ 195.7, 153.2, 149.0, 143.8, 130.0, 124.7, 123.6, 111.6, 109.7, 56.0, 55.9, 35.9, 15.5. **HRMS (EI)**: calcd for C<sub>13</sub>H<sub>16</sub>O<sub>3</sub>S: 252.0820; found: 252.0817.

### 2-(methylthiomethyl)-1-(4-methylthiophenyl)prop-2-en-1-one (3i)

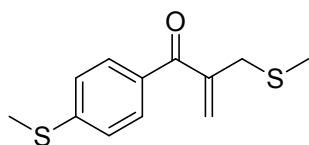

Following the general procedure to afford a yellow oil in 87% yield. **<sup>1</sup>H NMR** (400 MHz, CDCl<sub>3</sub>) δ 7.73 (d, *J* = 8.3 Hz, 2H), 7.27 (d, *J* = 8.1 Hz, 2H), 5.86 (s, 1H), 5.62 (s, 1H), 3.52 (s, 2H), 2.52 (s, 3H), 2.12 (s, 3H); **<sup>13</sup>C NMR** (100 MHz, CDCl<sub>3</sub>) δ 196.0, 145.4, 143.8, 133.5, 130.1, 124.8, 124.7, 35.6, 15.5, 14.8. **HRMS (EI)**: calcd for C<sub>12</sub>H<sub>14</sub>OS<sub>2</sub>: 238.0486; found: 238.0481.

### 2-(methylthiomethyl)-1-(4-(trifluoromethoxy)phenyl) prop-2-en-1-one (3j)

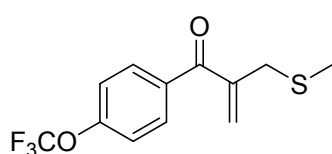

Following the general procedure to afford a yellow oil in 85% yield. **<sup>1</sup>H NMR** (400 MHz, CDCl<sub>3</sub>) δ 7.84 (d, *J* = 8.4 Hz, 2H), 7.29 (d, *J* = 8.3 Hz, 2H), 5.93 (s, 1H), 5.66 (s, 1H), 3.53 (s, 2H), 2.13 (s, 3H); **<sup>13</sup>C NMR** (100 MHz, CDCl<sub>3</sub>) δ 195.4, 152.2, 143.7, 135.7, 131.4, 125.9, 120.2, 35.3, 30.6 (d, *J* = 180.8 Hz), 15.5. **HRMS (EI)**: calcd for C<sub>12</sub>H<sub>11</sub>F<sub>3</sub>O<sub>2</sub>S: 276.0432; found: 276.0431.

### 1-([1,1'-biphenyl]-4-yl)-2-(methylthiomethyl)prop-2-en-1-one (3k)

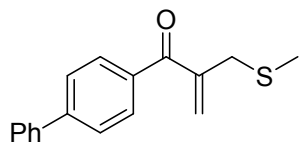

Following the general procedure to afford a yellow oil in 82% yield. **<sup>1</sup>H NMR** (400 MHz, CDCl<sub>3</sub>) δ 7.87 (d, *J* = 7.6 Hz, 2H), 7.67 (d, *J* = 7.7 Hz, 2H), 7.63 (d, *J* = 7.9 Hz, 2H), 7.47 (t, *J* = 7.5 Hz, 2H), 7.40 (t, *J* = 7.3 Hz, 1H), 5.93 (s, 1H), 5.72 (s, 1H), 3.57 (s, 2H), 2.15 (s, 3H); **<sup>13</sup>C NMR**

(100 MHz, CDCl<sub>3</sub>)  $\delta$  196.6, 145.3, 143.9, 139.9, 136.1, 130.2, 129.0, 128.2, 127.3, 127.0, 125.5, 35.4, 15.5. **HRMS (EI)**: calcd for C<sub>17</sub>H<sub>16</sub>OS: 268.0922; found: 268.0914.

### 1-(4-fluorophenyl)-2-(methylthiomethyl)prop-2-en-1-one (3l)

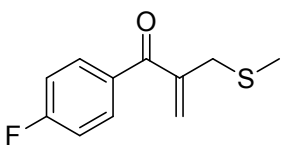 Following the general procedure to afford a yellow oil in 92% yield. **<sup>1</sup>H NMR** (400 MHz, CDCl<sub>3</sub>)  $\delta$  7.86-7.79 (m, 2H), 7.16-7.12 (m, 2H), 5.90 (s, 1H), 5.63 (s, 1H), 3.53 (s, 2H), 2.13 (s, 3H); **<sup>13</sup>C NMR** (100 MHz, CDCl<sub>3</sub>)  $\delta$  195.5, 165.4 (d,  $J$  = 254.4 Hz), 143.7, 133.6 (d,  $J$  = 3.1 Hz), 132.1 (d,  $J$  = 9.2 Hz), 125.3, 115.5 (d,  $J$  = 21.9 Hz), 35.4, 15.5. **HRMS (EI)**: calcd for C<sub>11</sub>H<sub>11</sub>FOS: 210.0515; found: 210.0511.

### 1-(4-chlorophenyl)-2-(methylthiomethyl)prop-2-en-1-one (3m)

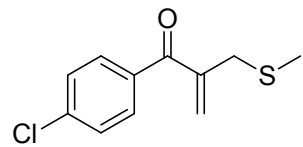 Following the general procedure to afford a yellow oil in 90% yield. **<sup>1</sup>H NMR** (400 MHz, CDCl<sub>3</sub>)  $\delta$  7.73 (d,  $J$  = 7.9 Hz, 2H), 7.43 (d,  $J$  = 8.0 Hz, 2H), 5.92 (s, 1H), 5.64 (s, 1H), 3.52 (s, 2H), 2.12 (s, 3H); **<sup>13</sup>C NMR** (100 MHz, CDCl<sub>3</sub>)  $\delta$  195.7, 143.7, 138.9, 135.7, 130.9, 128.6, 125.8, 35.3, 15.6. **HRMS (EI)**: calcd for C<sub>11</sub>H<sub>11</sub>ClOS: 226.0219; found: 226.0213.

### 1-(3-chlorophenyl)-2-(methylthiomethyl)prop-2-en-1-one (3n)

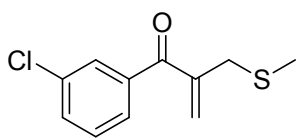 Following the general procedure to afford a yellow oil in 80% yield. **<sup>1</sup>H NMR** (400 MHz, CDCl<sub>3</sub>)  $\delta$  7.73 (s, 1H), 7.63 (d,  $J$  = 7.7 Hz, 1H), 7.53 (d,  $J$  = 7.9 Hz, 1H), 7.40 (t,  $J$  = 7.8 Hz, 1H), 5.95 (s, 1H), 5.68 (s, 1H), 3.52 (s, 2H), 2.13 (s, 3H); **<sup>13</sup>C NMR** (100 MHz, CDCl<sub>3</sub>)  $\delta$  195.4, 143.5, 139.1, 134.5, 132.4, 129.6, 129.4, 127.5, 126.5, 35.1, 15.5. **HRMS (EI)**: calcd for C<sub>11</sub>H<sub>11</sub>ClOS: 226.0219; found: 226.02161.

### 4-(2-(methylthiomethyl)acryloyl)benzonitrile (3o)

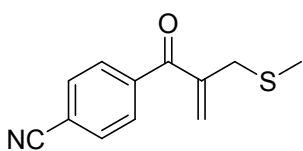 Following the general procedure to afford a yellow oil in 89% yield. **<sup>1</sup>H NMR** (400 MHz, CDCl<sub>3</sub>)  $\delta$  7.83 (d,  $J$  = 8.0 Hz, 2H), 7.77 (d,  $J$  = 8.0 Hz, 2H), 6.01 (s, 1H), 5.67 (s, 1H),

3.53 (s, 2H), 2.13 (s, 3H);  $^{13}\text{C}$  NMR (100 MHz,  $\text{CDCl}_3$ )  $\delta$  195.3, 143.5, 141.1, 132.2, 129.7, 127.3, 117.9, 115.7, 34.9, 15.6. **HRMS (EI)**: calcd for  $\text{C}_{12}\text{H}_{11}\text{NOS}$ : 217.0561; found: 217.0554.

#### 4-(2-(methylthiomethyl)acryloyl)benzoate (3p)

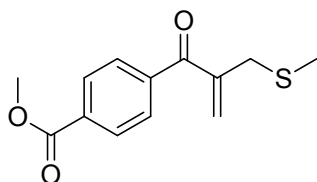

Following the general procedure to afford a yellow oil in 89% yield.  $^1\text{H}$  NMR (400 MHz,  $\text{CDCl}_3$ )  $\delta$  8.12 (d,  $J$  = 8.1 Hz, 2H), 7.79 (d,  $J$  = 8.1 Hz, 2H), 5.99 (s, 1H), 5.69 (s, 1H), 3.96 (s, 3H), 3.54 (s, 2H), 2.14 (s, 3H);  $^{13}\text{C}$  NMR (100 MHz,  $\text{CDCl}_3$ )  $\delta$  196.3, 166.2, 143.7, 141.2, 133.2, 129.5, 129.2, 127.0, 52.4, 34.9, 15.6. **HRMS (EI)**: calcd for  $\text{C}_{13}\text{H}_{14}\text{O}_3\text{S}$ : 250.0664; found: 250.0661.

#### 2-(methylthiomethyl)-1-(4-nitrophenyl)prop-2-en-1-one (3q)

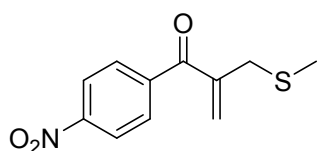

Following the general procedure to afford a yellow oil in 87% yield.  $^1\text{H}$  NMR (400 MHz,  $\text{CDCl}_3$ )  $\delta$  7.73 (d,  $J$  = 7.9 Hz, 2H), 7.43 (d,  $J$  = 8.0 Hz, 2H), 5.92 (s, 1H), 5.64 (s, 1H), 3.52 (s, 2H), 2.12 (s, 3H);  $^{13}\text{C}$  NMR (100 MHz,  $\text{CDCl}_3$ )  $\delta$  195.7, 143.7, 138.9, 135.7, 130.9, 128.6, 125.8, 35.3, 15.6. **HRMS (EI)**: calcd for  $\text{C}_{11}\text{H}_{11}\text{NO}_3\text{S}$ : 237.0460; found: 237.0455.

#### 2-(methylthiomethyl)-1-(3-nitrophenyl)prop-2-en-1-one (3r)

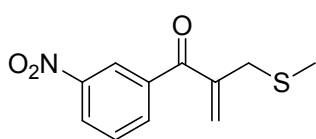

Following the general procedure to afford a yellow oil in 83% yield.  $^1\text{H}$  NMR (400 MHz,  $\text{CDCl}_3$ )  $\delta$  8.58 (s, 1H), 8.42 (d,  $J$  = 8.1 Hz, 1H), 8.10 (d,  $J$  = 7.6 Hz, 1H), 7.68 (t,  $J$  = 7.9 Hz, 1H), 6.03 (s, 1H), 5.70 (s, 1H), 3.55 (s, 2H), 2.16 (s, 3H);  $^{13}\text{C}$  NMR (100 MHz,  $\text{CDCl}_3$ )  $\delta$  194.5, 148.1, 143.4, 138.9, 134.9, 129.6, 126.9, 126.8, 124.3, 35.1, 15.6. **HRMS (EI)**: calcd for  $\text{C}_{11}\text{H}_{11}\text{NO}_3\text{S}$ : 237.0460; found: 237.0455.

#### 2-(methylthiomethyl)-1-(naphthalen-2-yl)prop-2-en-1-one (3s)

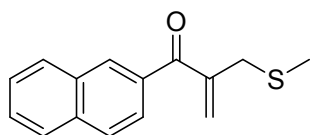

Following the general procedure to afford a yellow oil in 92% yield.  $^1\text{H}$  NMR (400 MHz,  $\text{CDCl}_3$ )  $\delta$  8.28 (s, 1H), 7.98–7.83 (m, 4H), 7.62–7.51 (m, 2H), 5.96 (s, 1H), 5.74 (s,

1H), 3.60 (s, 2H), 2.17 (s, 3H); <sup>13</sup>C NMR (100 MHz, CDCl<sub>3</sub>) δ 196.9, 144.0, 135.3, 134.7, 132.2, 131.2, 129.4, 128.3, 128.3, 127.8, 126.8, 125.7, 125.3, 35.5, 15.6. **HRMS (EI)**: calcd for C<sub>15</sub>H<sub>14</sub>O: 242.0765; found: 242.0761.

### 2-(methylthiomethyl)-1-(thiophen-2-yl)prop-2-en-1-one (3t)

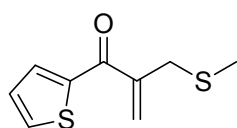

Following the general procedure to afford a yellow oil in 86% yield. <sup>1</sup>H NMR (400 MHz, CDCl<sub>3</sub>) δ 7.72–7.66 (m, 2H), 7.14 (t, *J* = 4.3 Hz, 1H), 5.87 (s, 1H), 5.82 (s, 1H), 3.52 (s, 2H), 2.10 (s, 3H); <sup>13</sup>C NMR (100 MHz, CDCl<sub>3</sub>) δ 188.3, 144.2, 143.4, 134.3, 134.0, 127.9, 123.4, 35.6, 15.3. **HRMS (EI)**: calcd for C<sub>9</sub>H<sub>10</sub>OS<sub>2</sub>: 198.0173; found: 198.0170.

### (E)-4-(methylthiomethyl)-1-phenylpenta-1,4-dien-3-one (3u)

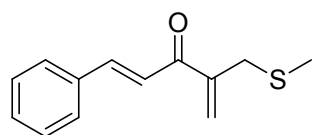

Following the general procedure to afford a yellow solid in 84% yield. <sup>1</sup>H NMR (400 MHz, CDCl<sub>3</sub>) δ 7.61 (d, *J* = 15.7 Hz, 1H), 7.53–7.49 (m, 2H), 7.35–7.30 (m, 3H), 7.22 – 7.16 (m, 1H), 6.05 (s, 1H), 5.82 (s, 1H), 3.39 (s, 2H), 1.99 (s, 3H); <sup>13</sup>C NMR (100 MHz, CDCl<sub>3</sub>) δ 190.7, 145.2, 144.3, 134.8, 130.5, 128.9, 128.4, 124.3, 121.6, 34.5, 15.4. **HRMS (EI)**: calcd for C<sub>13</sub>H<sub>14</sub>OS: 218.0765; found: 218.0760.

### (E)-4-(methylthiomethyl)-1-(p-tolyl)penta-1,4-dien-3-one (3v)

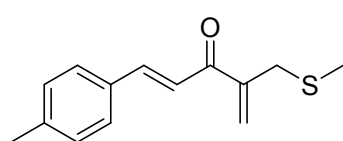

Following the general procedure to afford a yellow solid in 82% yield. <sup>1</sup>H NMR (400 MHz, CDCl<sub>3</sub>) δ 7.67 (d, *J* = 15.7 Hz, 1H), 7.48 (d, *J* = 7.7 Hz, 2H), 7.25–7.18 (m, 3H), 6.11 (s, 1H), 5.88 (s, 1H), 3.47 (s, 2H), 2.38 (s, 3H), 2.07 (s, 3H); <sup>13</sup>C NMR (100 MHz, CDCl<sub>3</sub>) δ 190.8, 145.3, 144.4, 141.0, 132.0, 129.7, 128.4, 124.0, 120.7, 34.5, 21.5, 15.4. **HRMS (EI)**: calcd for C<sub>14</sub>H<sub>16</sub>OS: 232.0922; found: 232.0917.

### 2-methyl-1-phenylprop-2-en-1-one (4a).

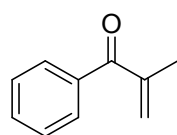

Following the general procedure to afford a pale yellow oil in 72% yield. <sup>1</sup>H NMR (400 MHz, CDCl<sub>3</sub>): δ 7.65 (d, *J* = 7.7 Hz, 2H), 7.45 (t, *J* = 7.4 Hz, 1H), 7.35 (t, *J* = 7.6 Hz, 2H), 5.83 (s, 1H), 5.54 (s, 1H),



1.99 (s, 3H). <sup>13</sup>C NMR (100 MHz, CDCl<sub>3</sub>): δ 198.3, 143.7, 137.7, 132.0, 129.4, 128.1, 127.1, 18.6.

### 2-methylene-1-phenylpentan-1-one (4b).

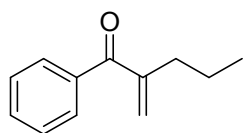

Following the general procedure to afford a yellow oil in 67% yield. <sup>1</sup>H NMR (400 MHz, CDCl<sub>3</sub>): δ 7.76 (d, *J* = 7.7 Hz, 2H), 7.53 (t, *J* = 7.3 Hz, 1H), 7.43 (t, *J* = 7.5 Hz, 2H), 5.82 (s, 1H), 5.58 (s, 1H), 2.46 (t, *J* = 7.6 Hz, 2H), 1.62–1.47 (m, 2H), 0.97 (t, *J* = 7.3 Hz, 3H). <sup>13</sup>C NMR (100 MHz, CDCl<sub>3</sub>): δ 198.5, 148.2, 137.9, 132.1, 129.5, 128.1, 125.3, 34.3, 21.3, 13.8.

### 3-(methylthiomethyl)chroman-4-one (3x)

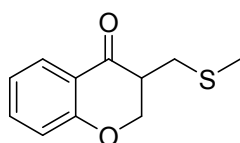

Following the general procedure to afford a yellow oil in 75% yield. <sup>1</sup>H NMR (400 MHz, CDCl<sub>3</sub>) δ 7.89 (d, *J* = 7.9 Hz, 1H), 7.48 (t, *J* = 7.8 Hz, 1H), 7.02 (t, *J* = 7.5 Hz, 1H), 6.98 (d, *J* = 8.4 Hz, 1H), 4.66 (dd, *J* = 11.5, 4.3 Hz, 1H), 4.50–4.44 (m, 1H), 3.04 (dd, *J* = 13.6, 4.0 Hz, 1H), 2.89 (ddd, *J* = 13.5, 9.0, 4.2 Hz, 1H), 2.66 (dd, *J* = 13.5, 10.0 Hz, 1H), 2.16 (s, 3H); <sup>13</sup>C NMR (100 MHz, CDCl<sub>3</sub>) δ 192.8, 161.6, 136.1, 127.4, 121.5, 120.4, 117.8, 69.4, 45.4, 30.8, 16.2. HRMS (EI): calcd for C<sub>11</sub>H<sub>12</sub>O<sub>2</sub>S: 208.0558; found: 208.5553.

### 7-chloro-3-(methylthiomethyl)chroman-4-one (3y)

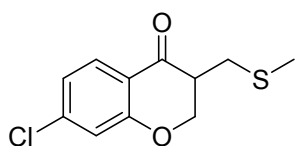

Following the general procedure to afford a pale yellow solid in 84% yield. <sup>1</sup>H NMR (400 MHz, CDCl<sub>3</sub>) δ 7.82 (d, *J* = 8.8 Hz, 1H), 7.06–6.98 (m, 2H), 4.67 (dd, *J* = 11.5, 4.4 Hz, 1H), 4.48 (dd, *J* = 10.7, 9.6 Hz, 1H), 3.03 (dd, *J* = 13.7, 3.8 Hz, 1H), 2.89 (ddd, *J* = 13.1, 8.9, 4.1 Hz, 1H), 2.70–2.61 (m, 1H), 2.16 (s, 3H); <sup>13</sup>C NMR (100 MHz, CDCl<sub>3</sub>) δ 191.8, 161.9, 141.9, 128.6, 122.4, 119.0, 118.0, 69.8, 45.3, 30.7, 16.2. HRMS (EI): calcd for C<sub>11</sub>H<sub>11</sub>ClO<sub>2</sub>S: 242.0168; found: 242.0161.

### 6-chloro-3-(methylthiomethyl)chroman-4-one (3z)

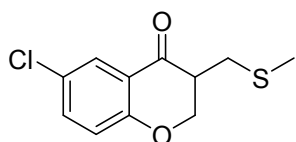

Following the general procedure to afford a pale yellow solid in 80% yield. <sup>1</sup>H NMR (400 MHz, CDCl<sub>3</sub>) δ 7.84 (s,

1H), 7.42 (dd,  $J = 8.9, 1.6$  Hz, 1H), 6.94 (d,  $J = 8.9$  Hz, 1H), 4.66 (dd,  $J = 11.5, 4.4$  Hz, 1H), 4.47 (dd,  $J = 10.8, 9.5$  Hz, 1H), 3.02 (dd,  $J = 13.7, 4.0$  Hz, 1H), 2.91 (dd,  $J = 9.4, 4.3$  Hz, 1H), 2.65 (dd,  $J = 13.6, 9.9$  Hz, 1H), 2.16 (s, 3H);  $^{13}\text{C}$  NMR (100 MHz,  $\text{CDCl}_3$ )  $\delta$  191.7, 160.0, 135.9, 127.1, 126.7, 121.2, 119.6, 69.6, 45.2, 30.6, 16.2. **HRMS (EI)**: calcd for  $\text{C}_{11}\text{H}_{11}\text{ClO}_2\text{S}$ : 242.0168; found: 242.0161.

### 3-(methylthio)-1-phenylpropan-1-one (C)

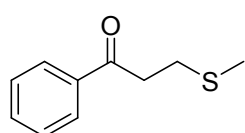

Yellow oil.  $^1\text{H}$  NMR (400 MHz,  $\text{CDCl}_3$ )  $\delta$  7.96 (d,  $J = 7.9$  Hz, 2H), 7.57 (t,  $J = 7.4$  Hz, 1H), 7.47 (t,  $J = 7.5$  Hz, 2H), 3.29 (t,  $J = 7.3$  Hz, 2H), 2.91 (t,  $J = 7.4$  Hz, 2H), 2.16 (s, 3H);  $^{13}\text{C}$  NMR (100 MHz,  $\text{CDCl}_3$ )  $\delta$  198.4, 136.6, 133.2, 128.6, 128.0, 38.6, 28.5, 15.9. **HRMS (EI)**: calcd for  $\text{C}_{10}\text{H}_{12}\text{OS}$ : 180.0609; found: 180.0603.

### 1-phenylprop-2-en-1-one (D)

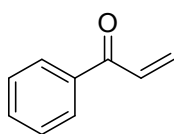

Colorless oil.  $^1\text{H}$  NMR (400 MHz,  $\text{CDCl}_3$ ):  $\delta$  7.95 (d,  $J = 7.7$  Hz, 2H), 7.58 (t,  $J = 7.3$  Hz, 1H), 7.48 (t,  $J = 7.5$  Hz, 2H), 7.16 (dd,  $J = 17.1, 10.6$  Hz, 1H), 6.44 (d,  $J = 17.1$  Hz, 1H), 5.94 (d,  $J = 10.6$  Hz, 1H);  $^{13}\text{C}$  NMR (100 MHz,  $\text{CDCl}_3$ ):  $\delta$  191.1, 137.2, 133.0, 132.4, 130.2, 128.7, 128.6.

### 1-phenylprop-2-en-1-one-3,3-d<sub>2</sub> (D-d<sub>2</sub>)

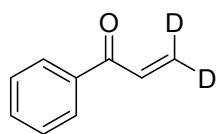

Colorless oil.  $^1\text{H}$  NMR (400 MHz,  $\text{CDCl}_3$ )  $\delta$  7.95 (d,  $J = 7.8$  Hz, 2H), 7.58 (t,  $J = 7.3$  Hz, 1H), 7.49 (t,  $J = 7.5$  Hz, 2H), 7.15 (s, 1H).

### 2-((methyl-d<sub>3</sub>)thiomethyl-d<sub>2</sub>)-1-phenylprop-2-en-1-one-3,3-d<sub>2</sub> (3a-d<sub>7</sub>)

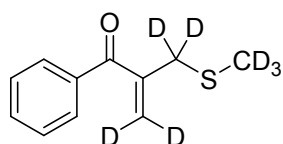

Following the general procedure to afford a yellow oil in 81% yield.  $^1\text{H}$  NMR (400 MHz,  $\text{CDCl}_3$ )  $\delta$  7.77 (d,  $J = 7.6$  Hz, 2H), 7.56 (t,  $J = 7.4$  Hz, 1H), 7.45 (t,  $J = 7.5$  Hz, 2H), 5.92 (s, 1H), 5.68 (s, 1H), 3.54 (s, 1H). **HRMS (EI)**: calcd for  $\text{C}_{11}\text{H}_5\text{D}_7\text{OS}$ : 199.1048; found: 199.1042.

## IV. NMR Spectra

### Compound 3a

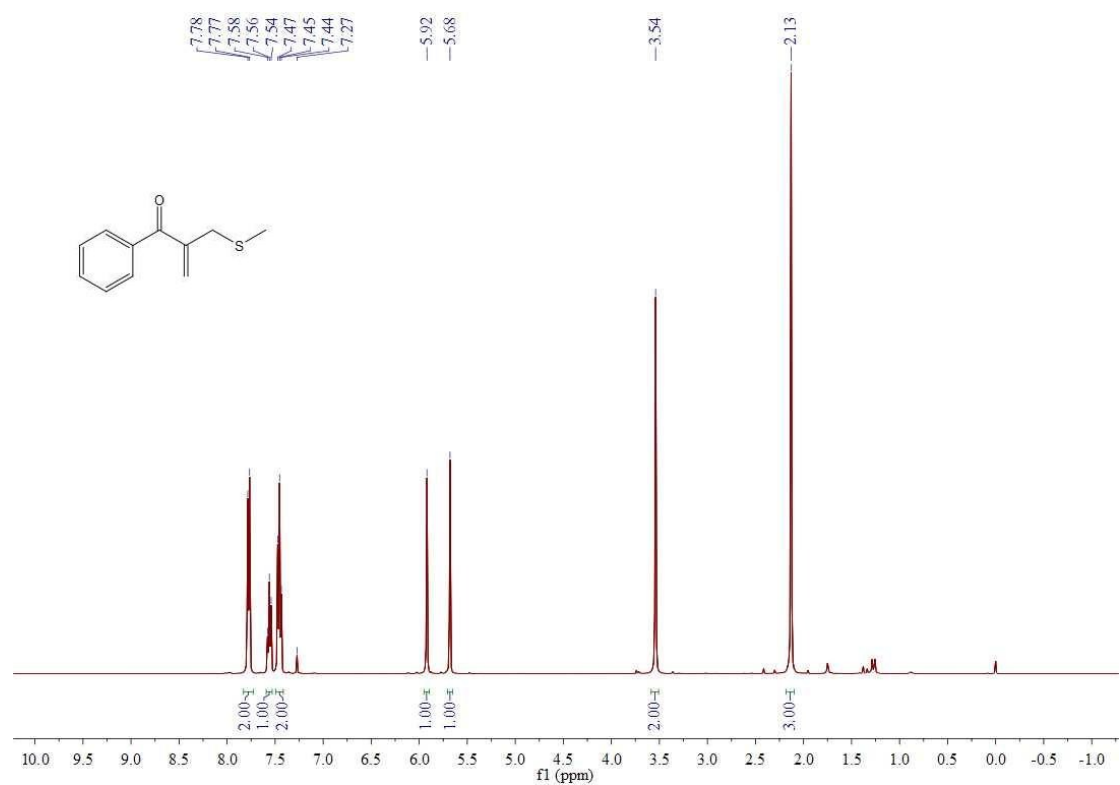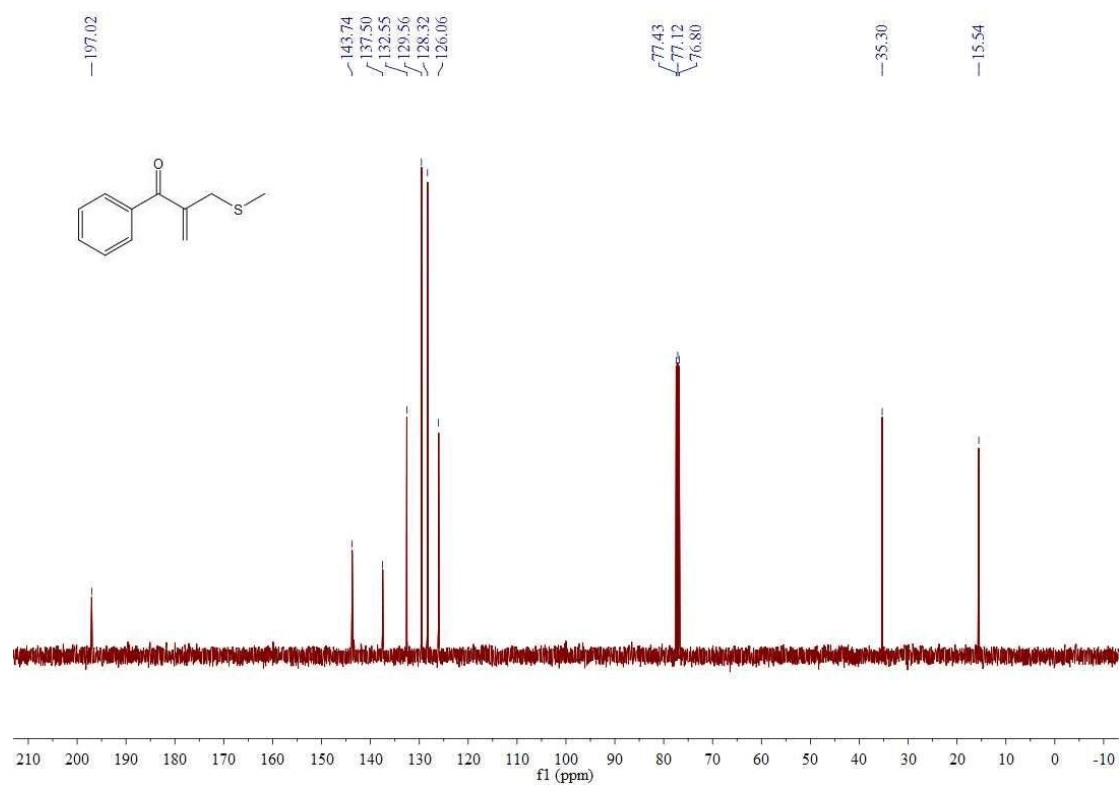

# Compound 3b

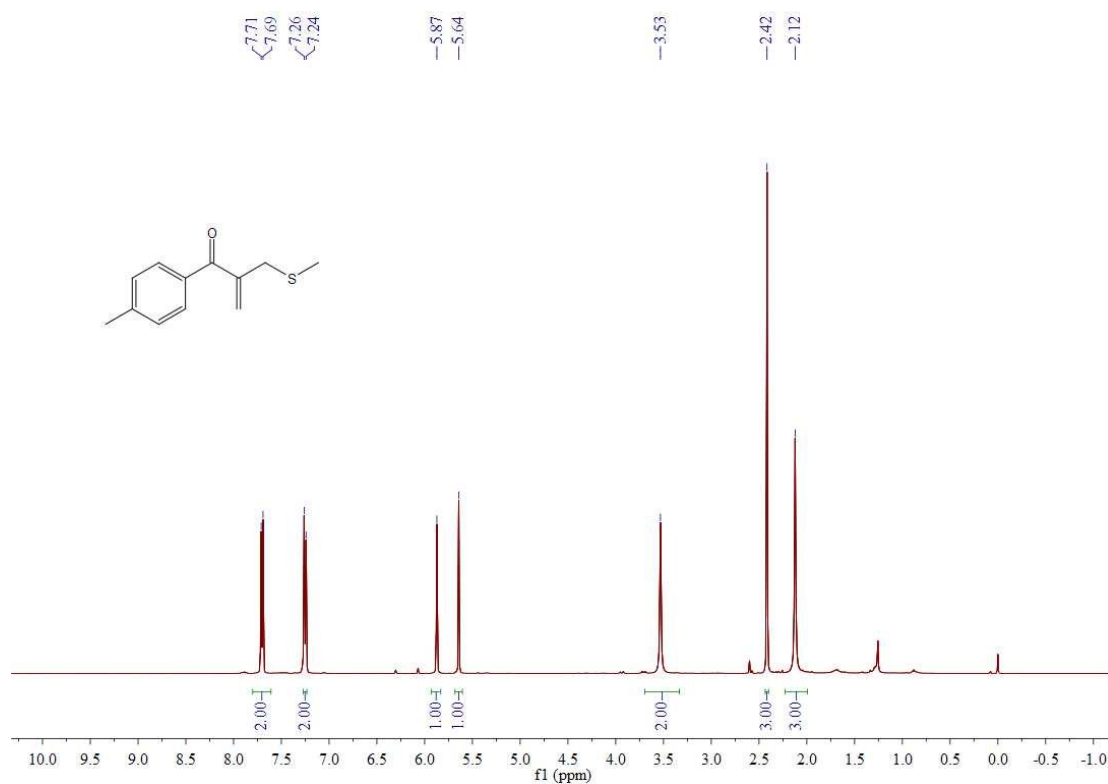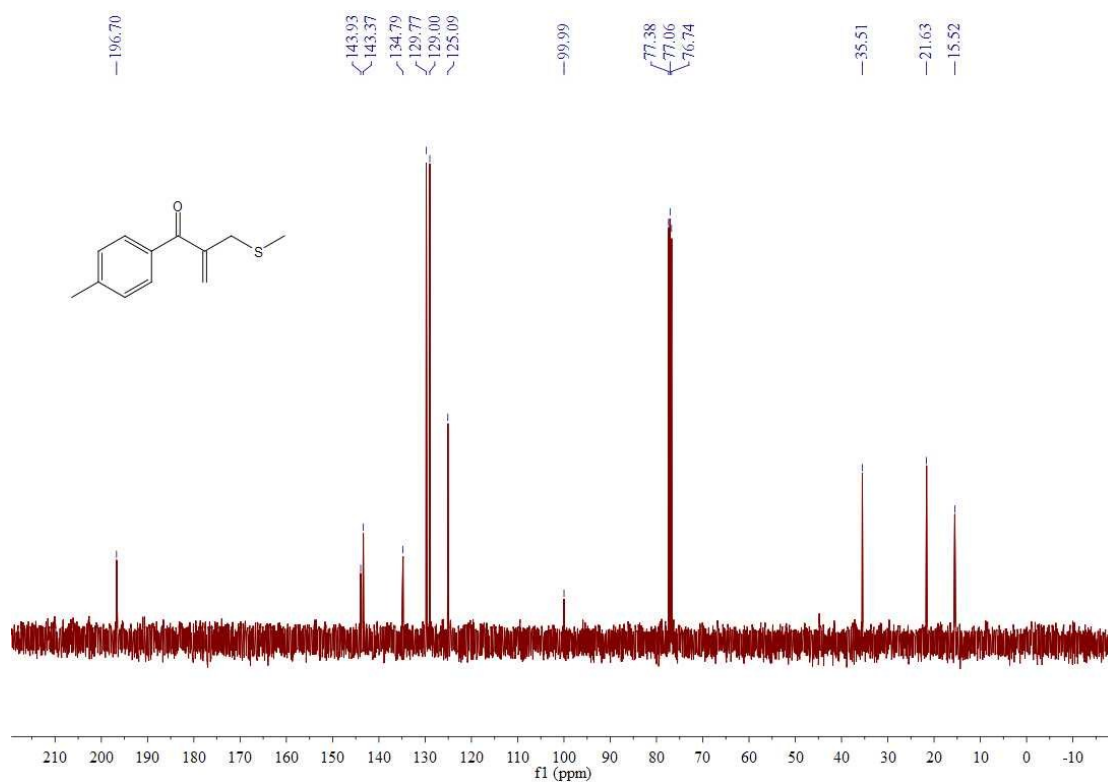

# Compound 3c

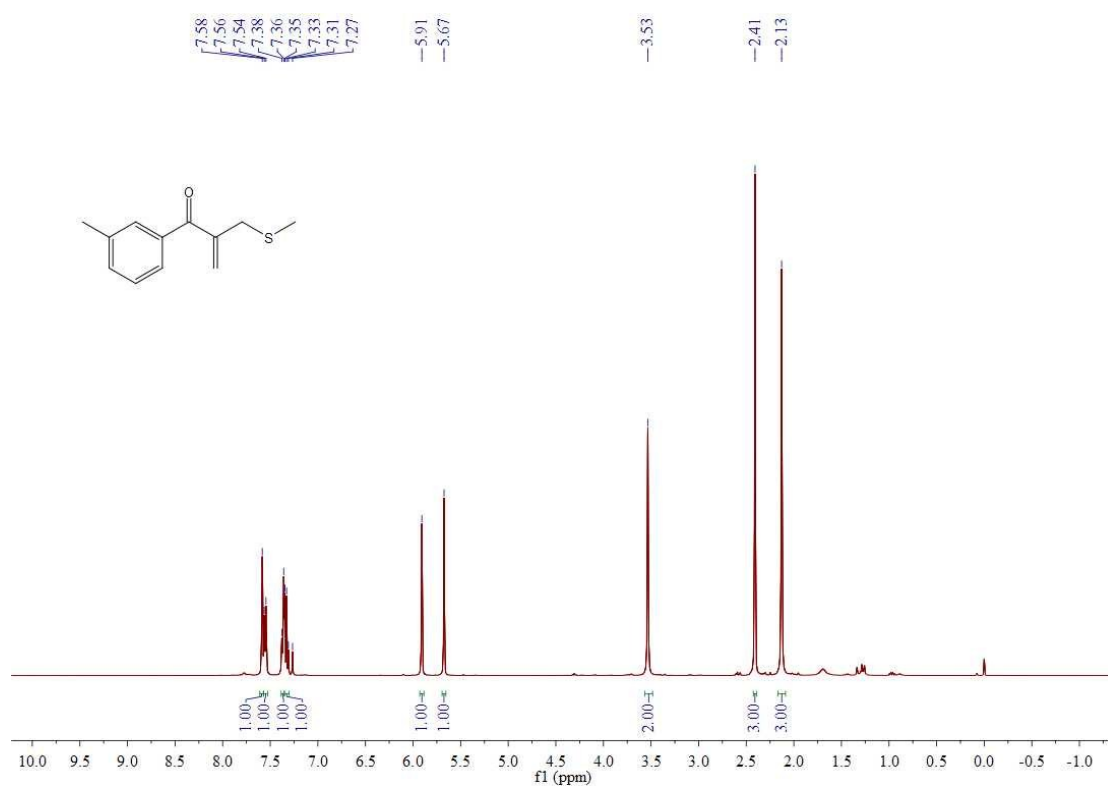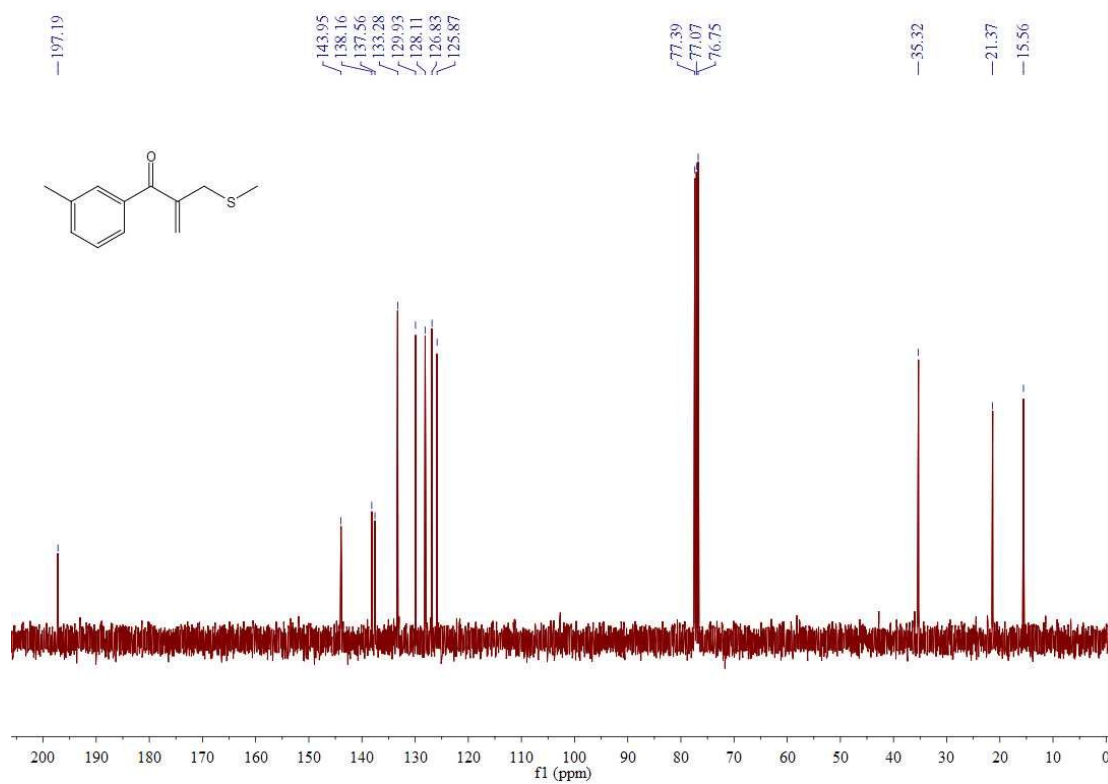

# Compound 3d

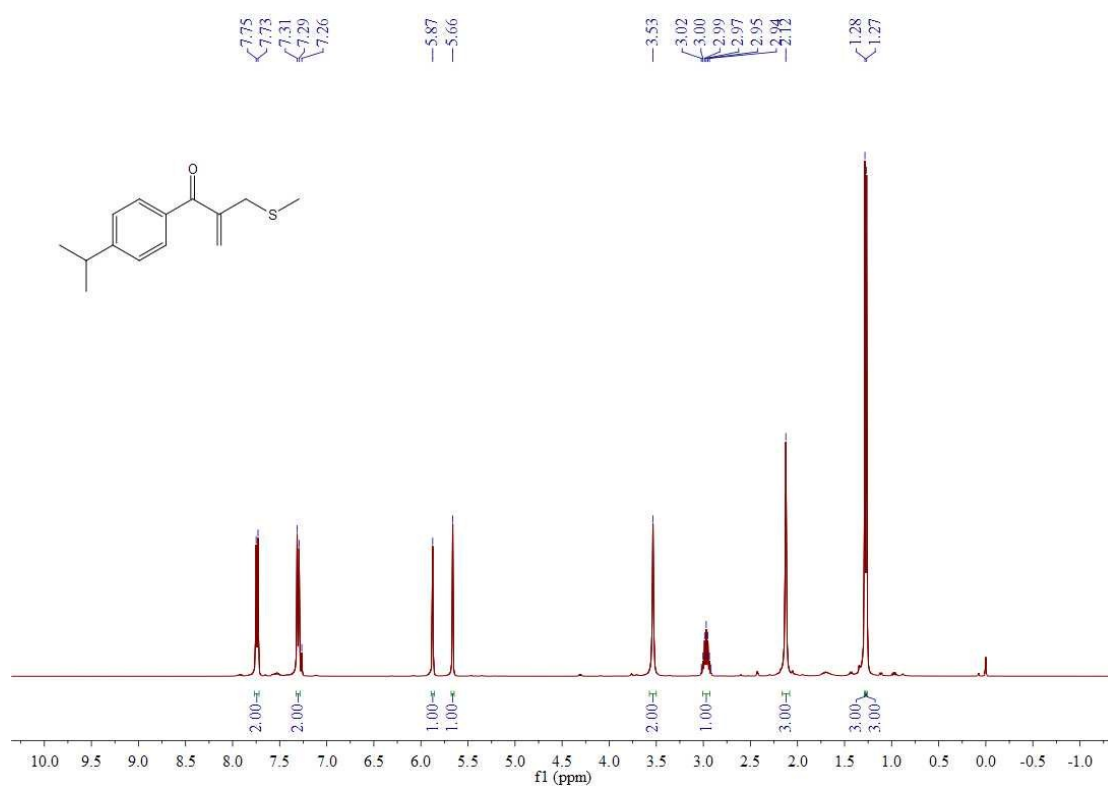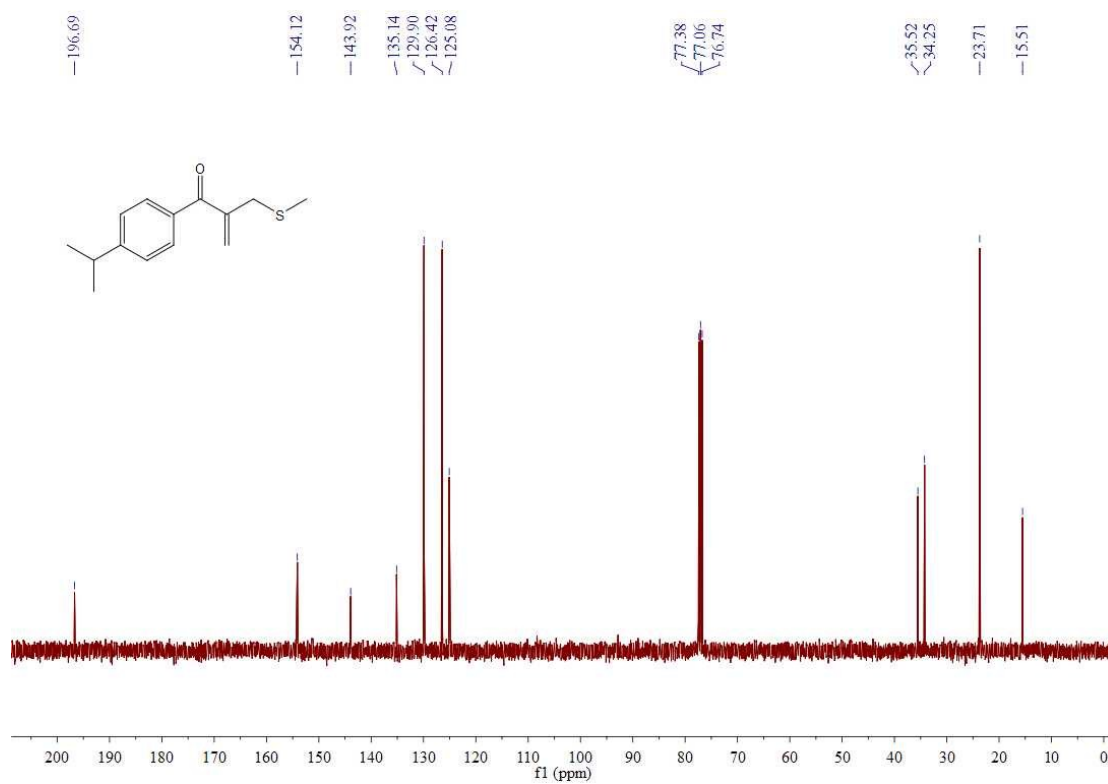

# Compound 3e

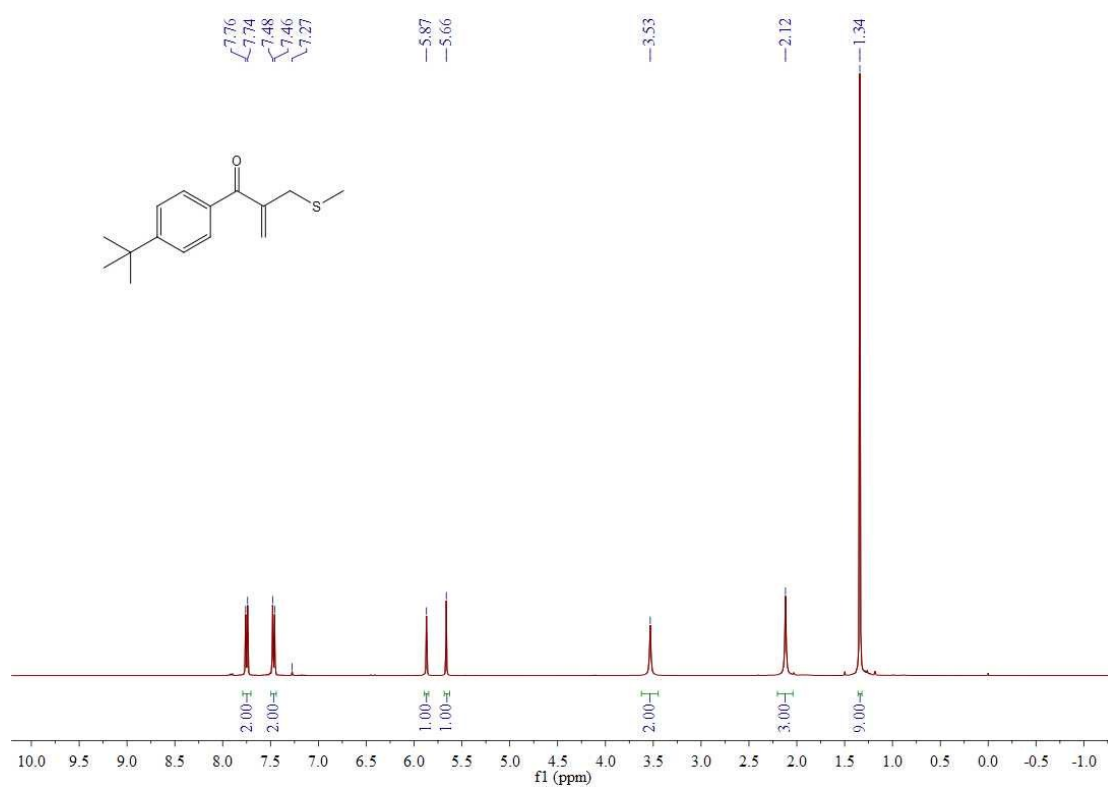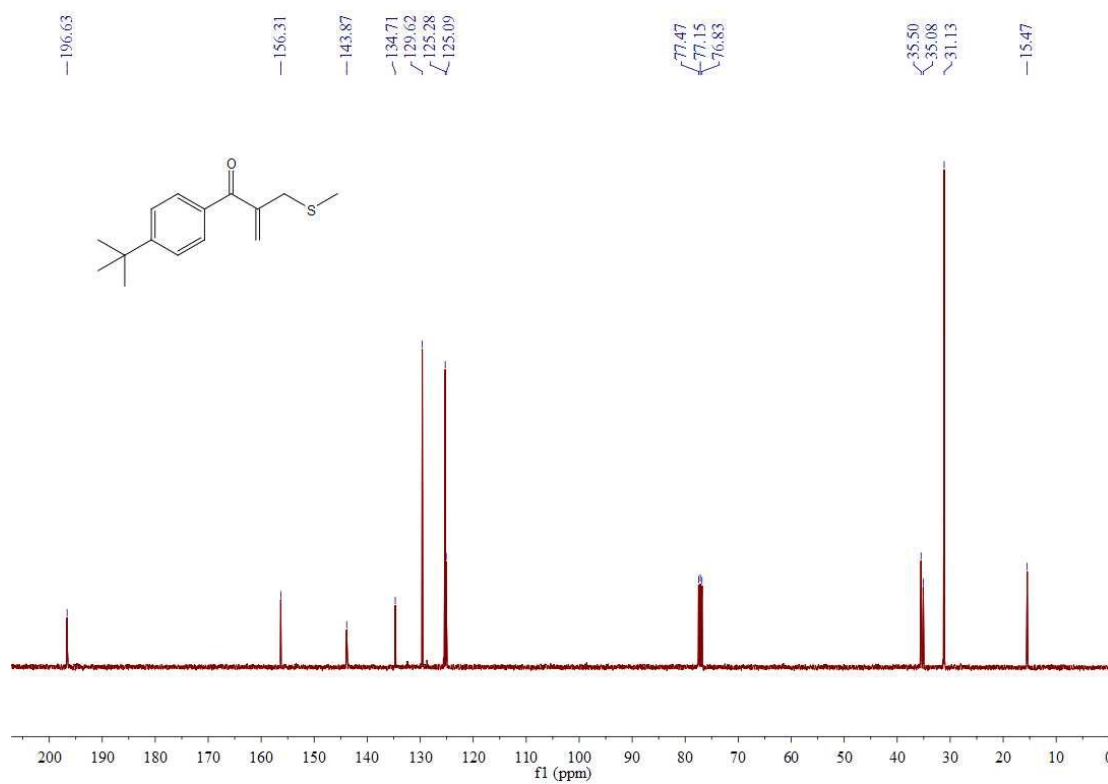

# Compound 3f

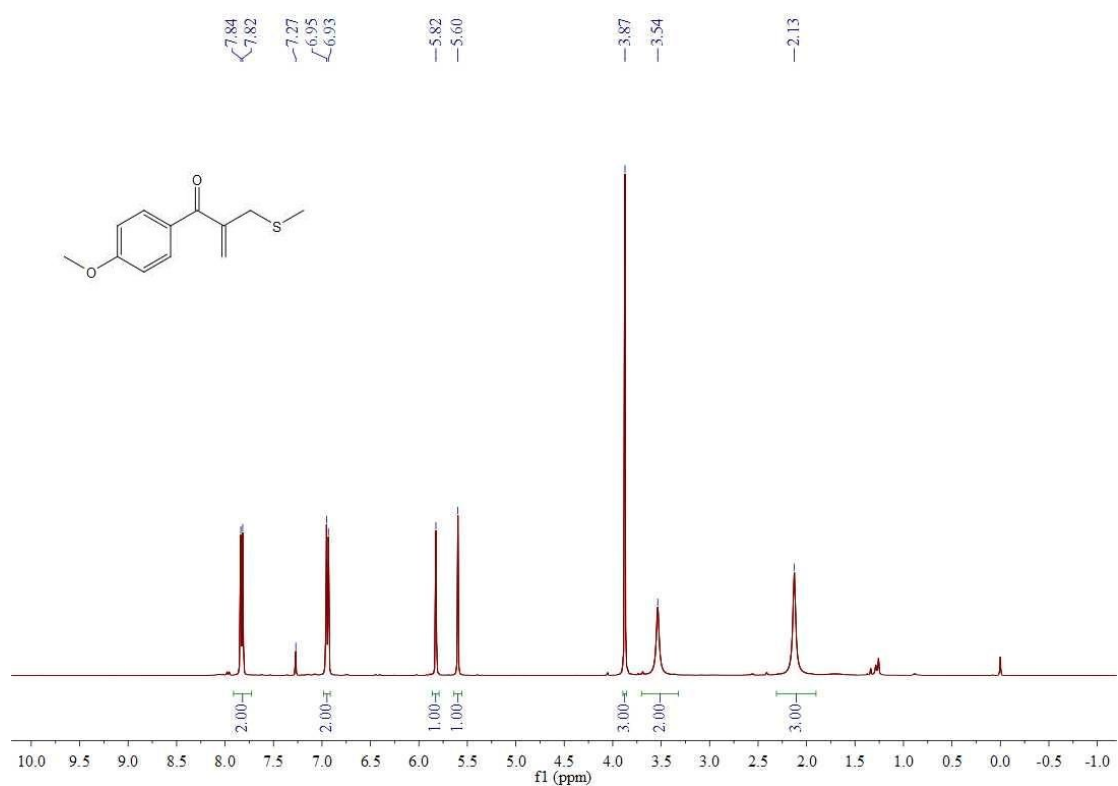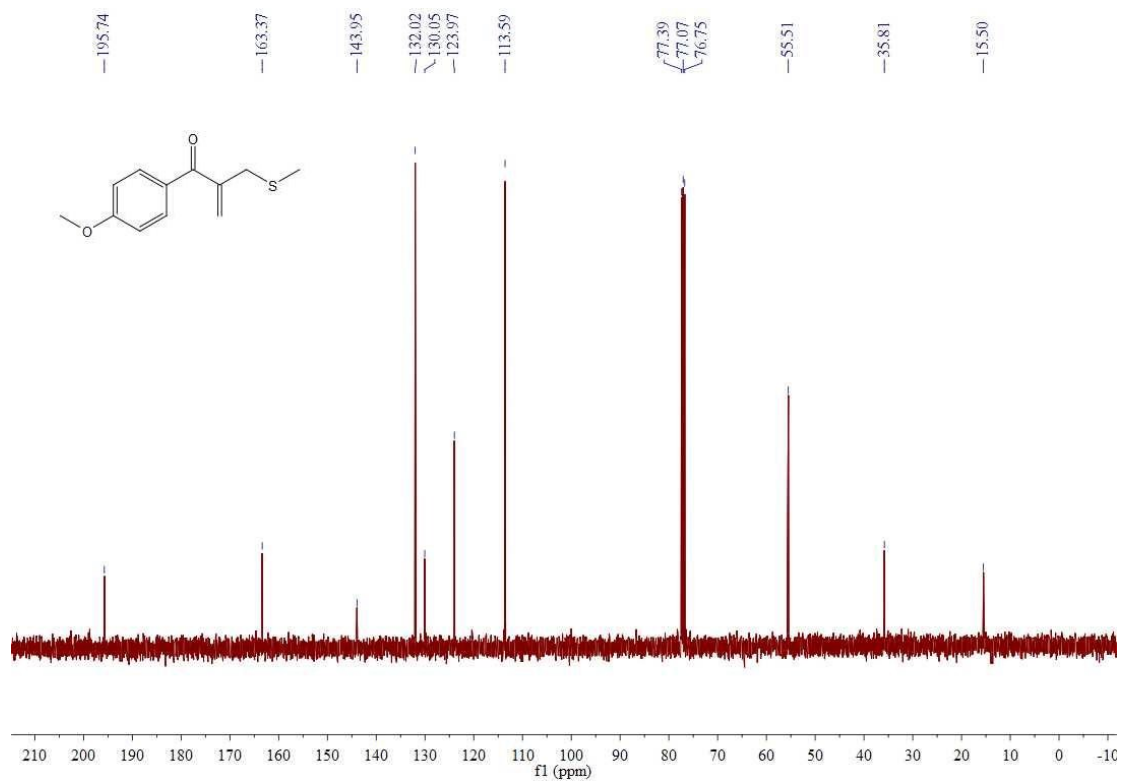



# Compound 3g

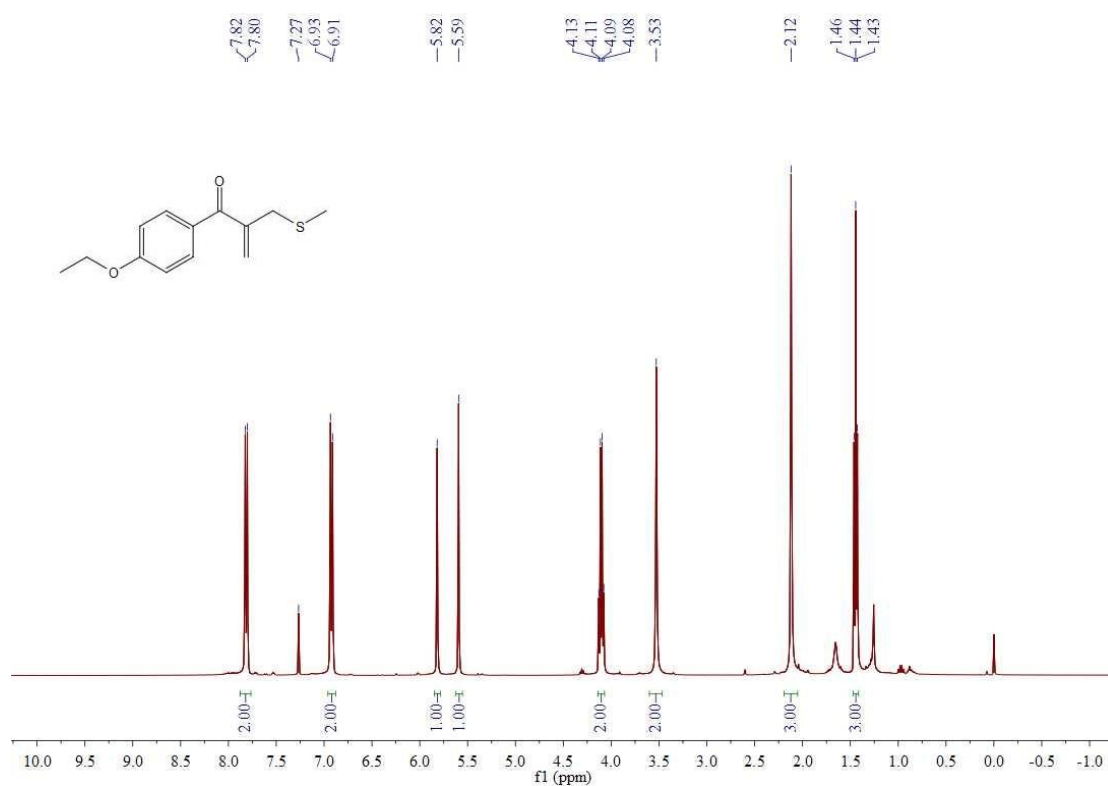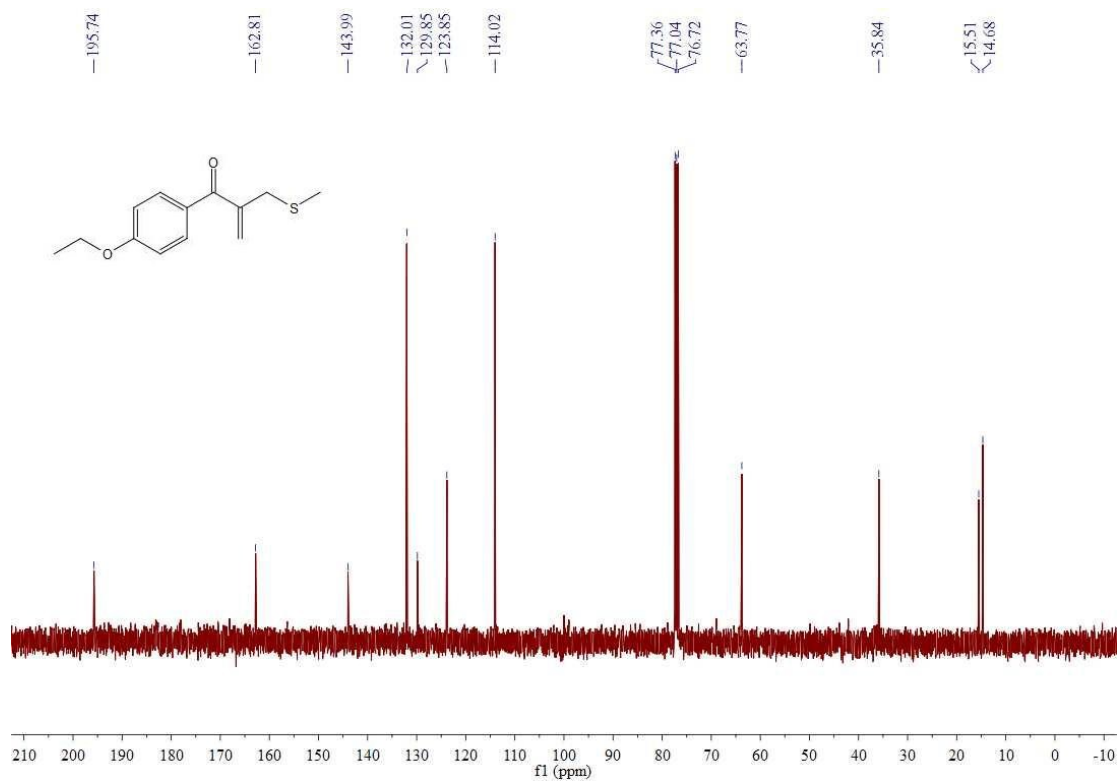

# Compound 3h

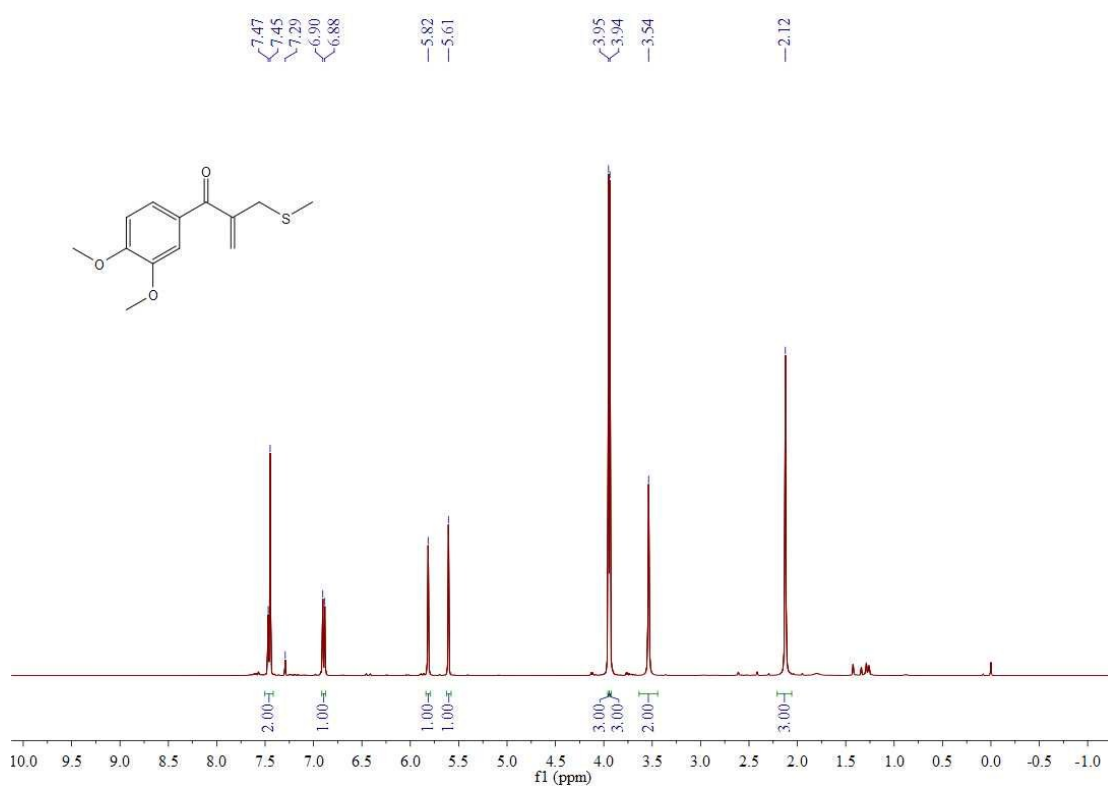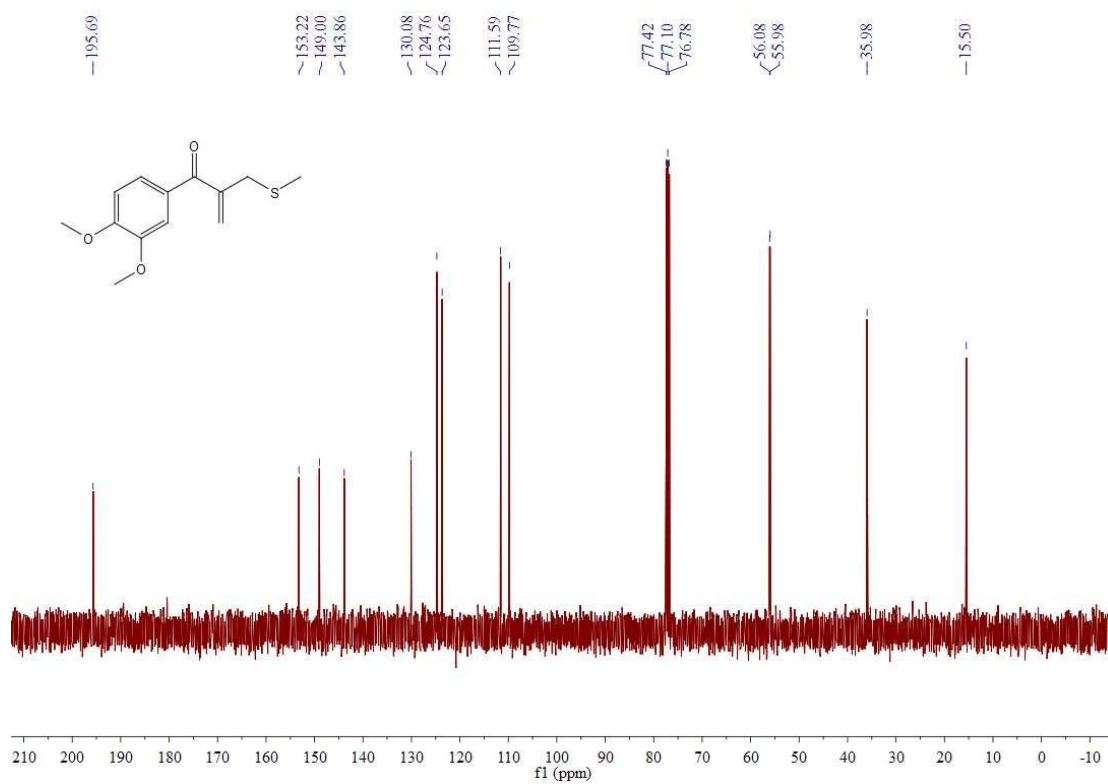

# Compound 3i

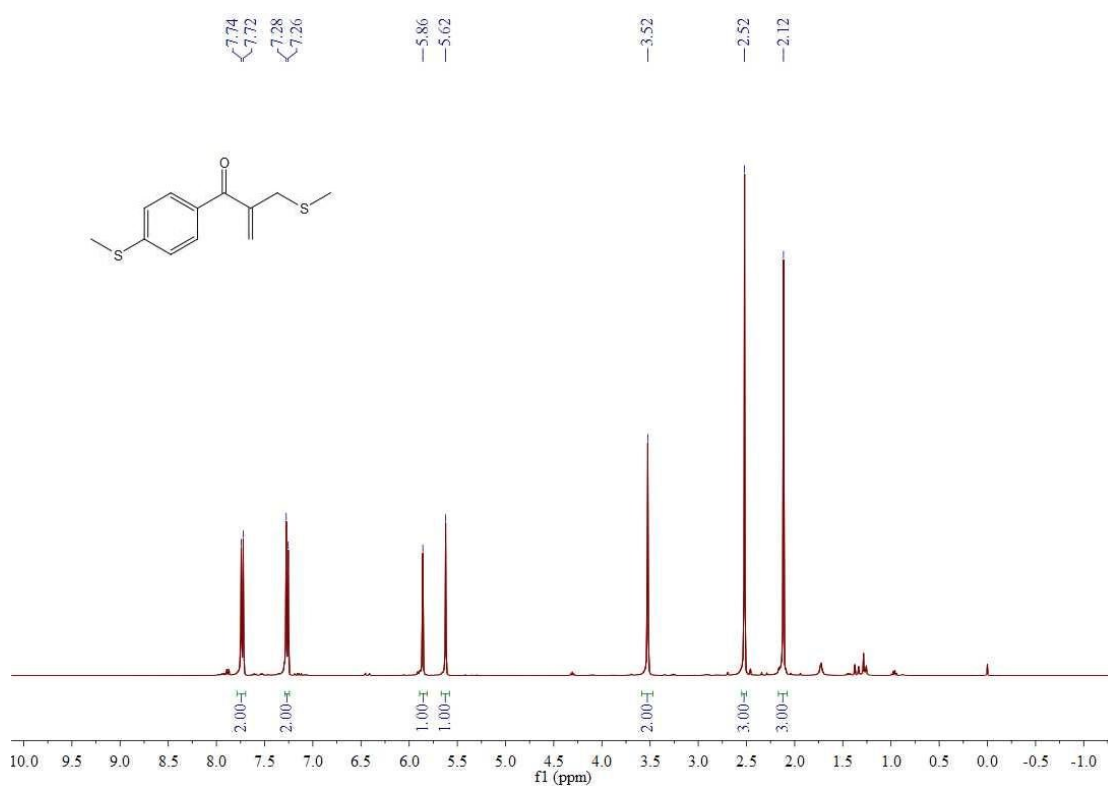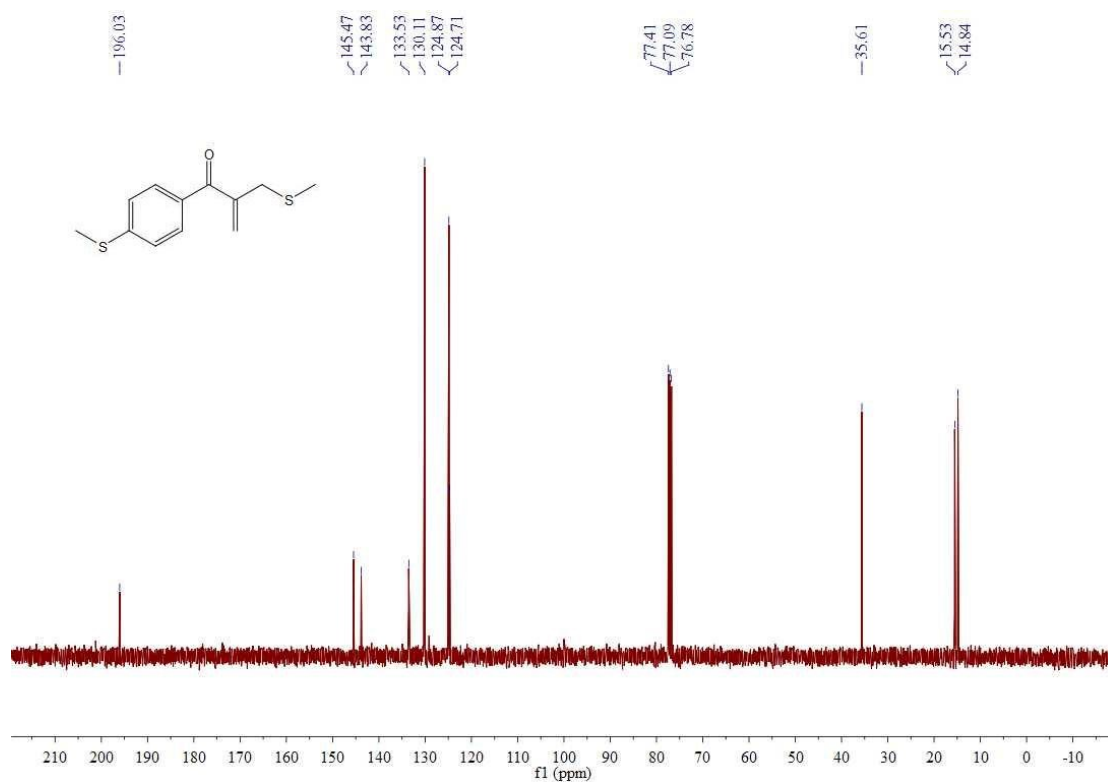

# Compound 3j

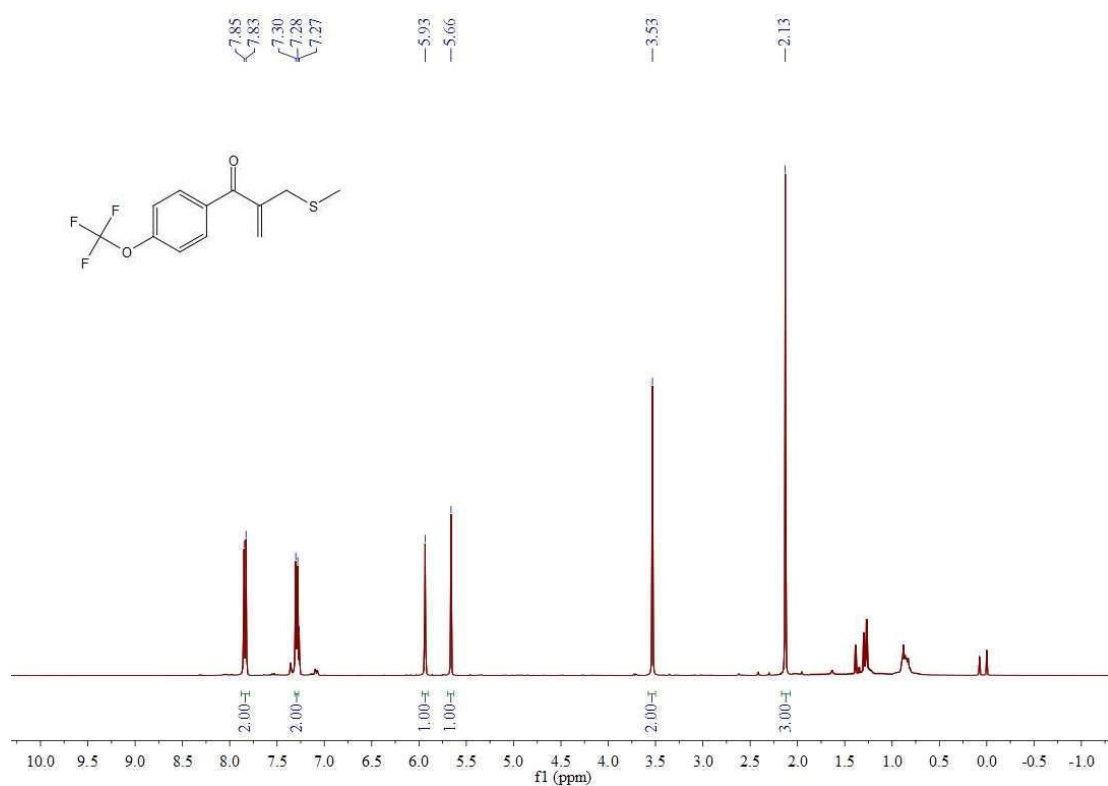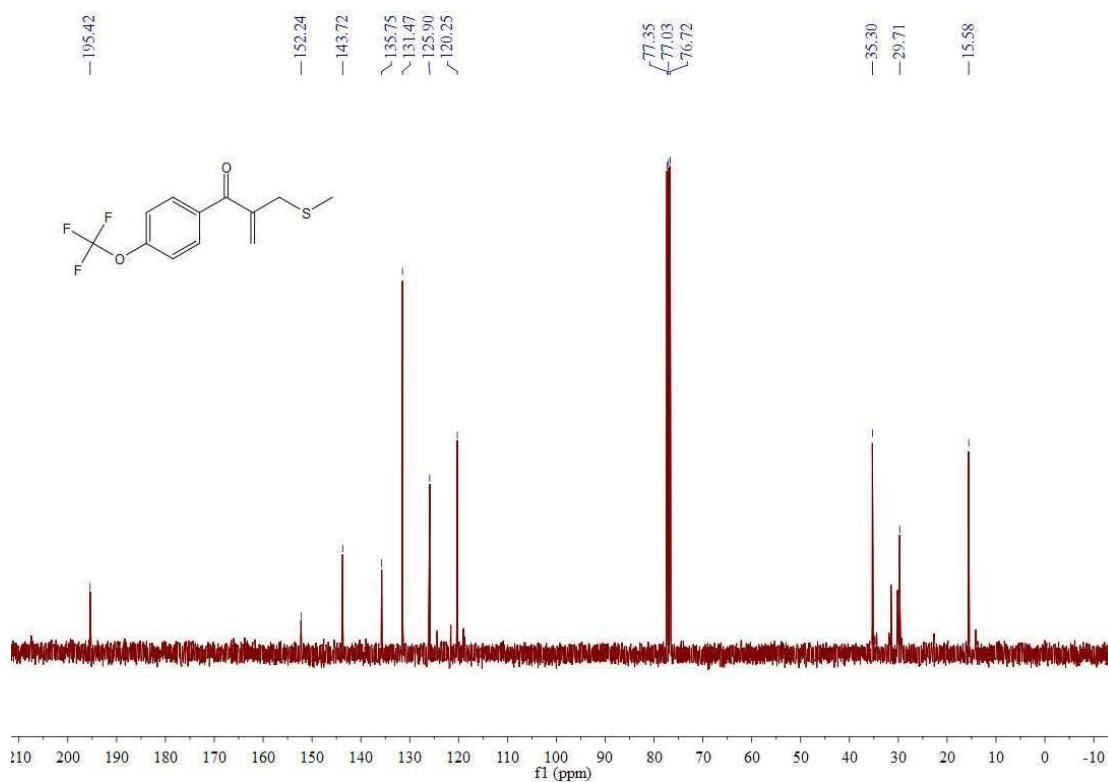

# Compound 3k

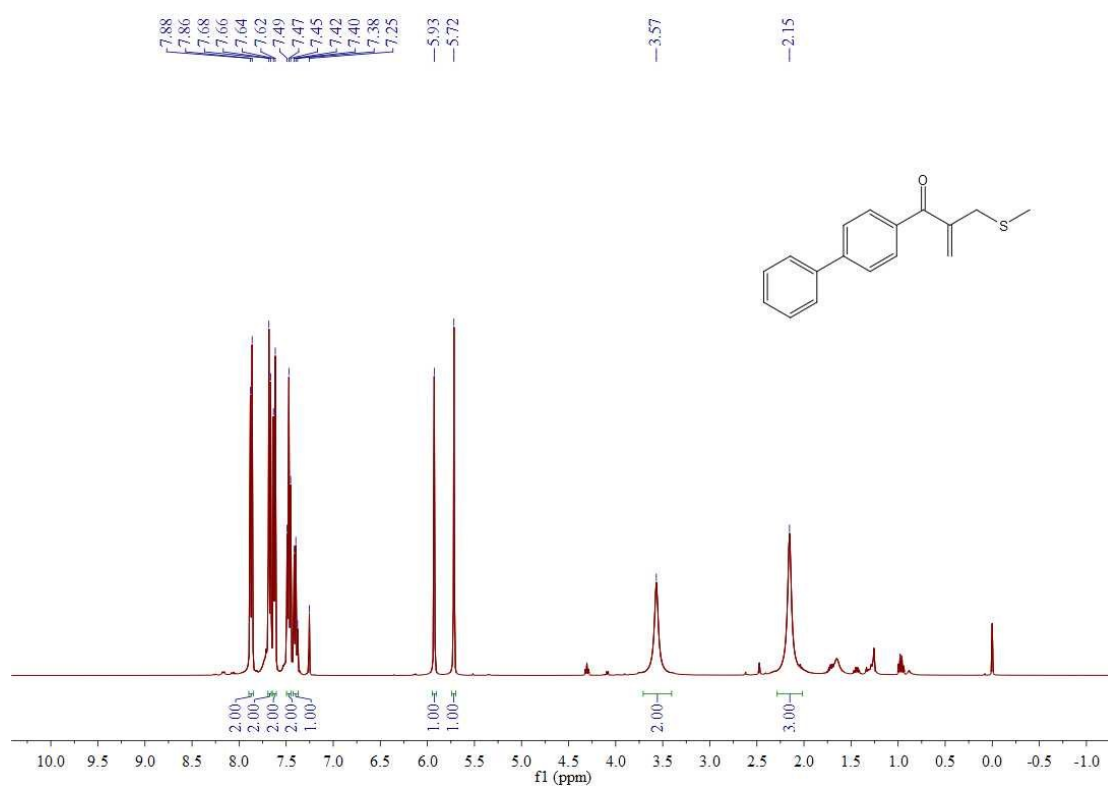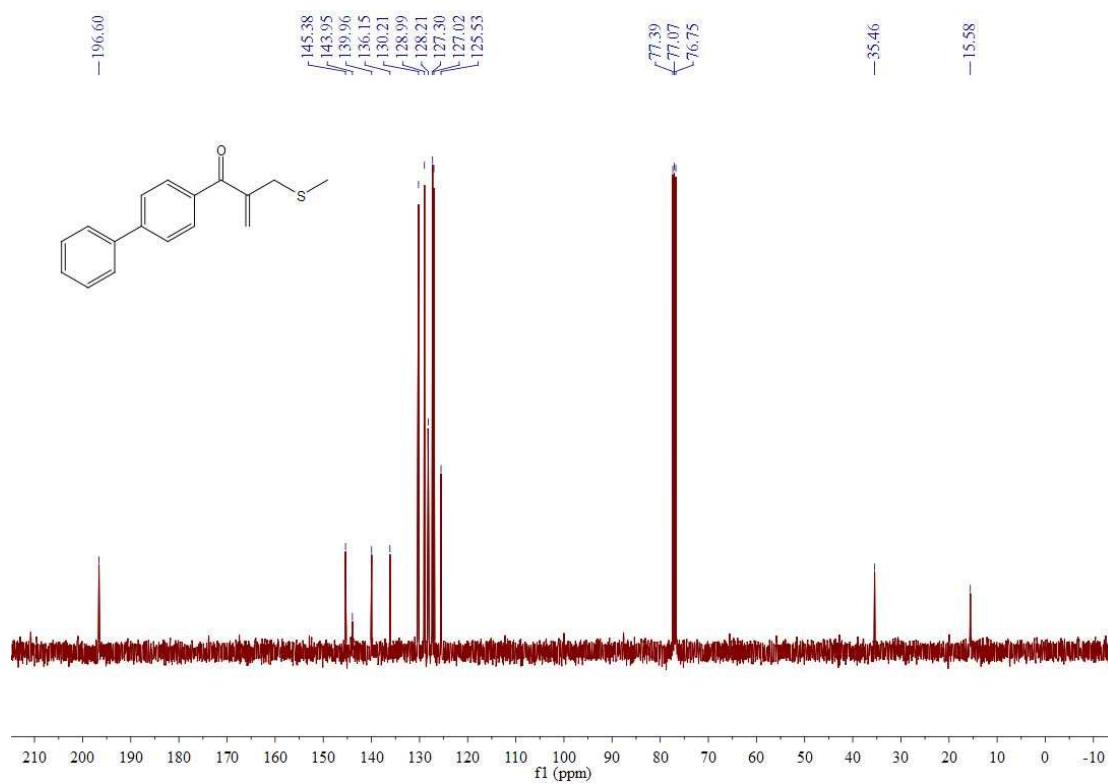

# Compound 3l

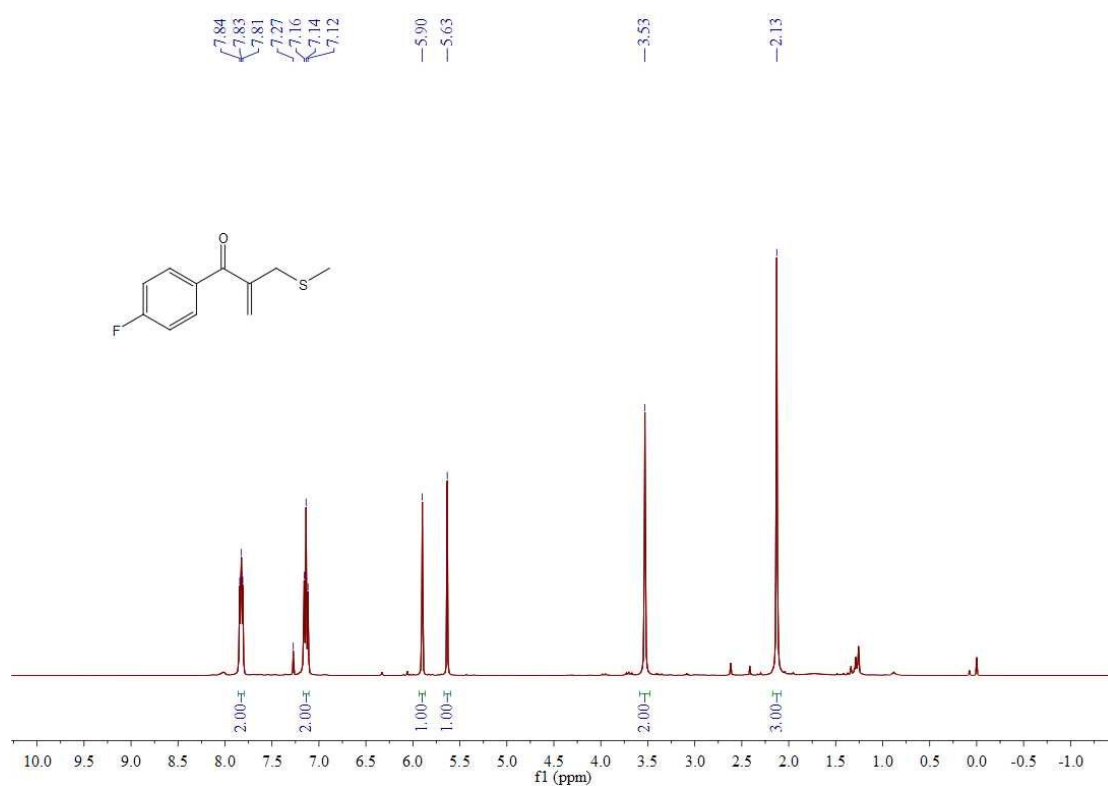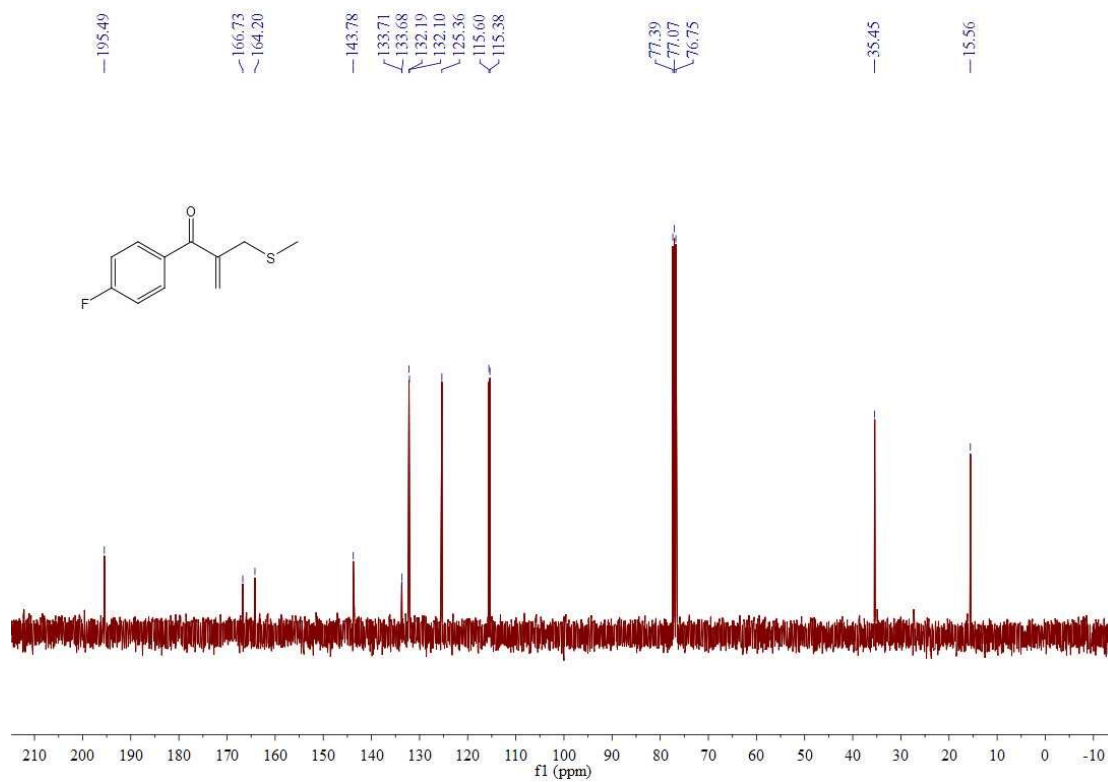

# Compound 3m

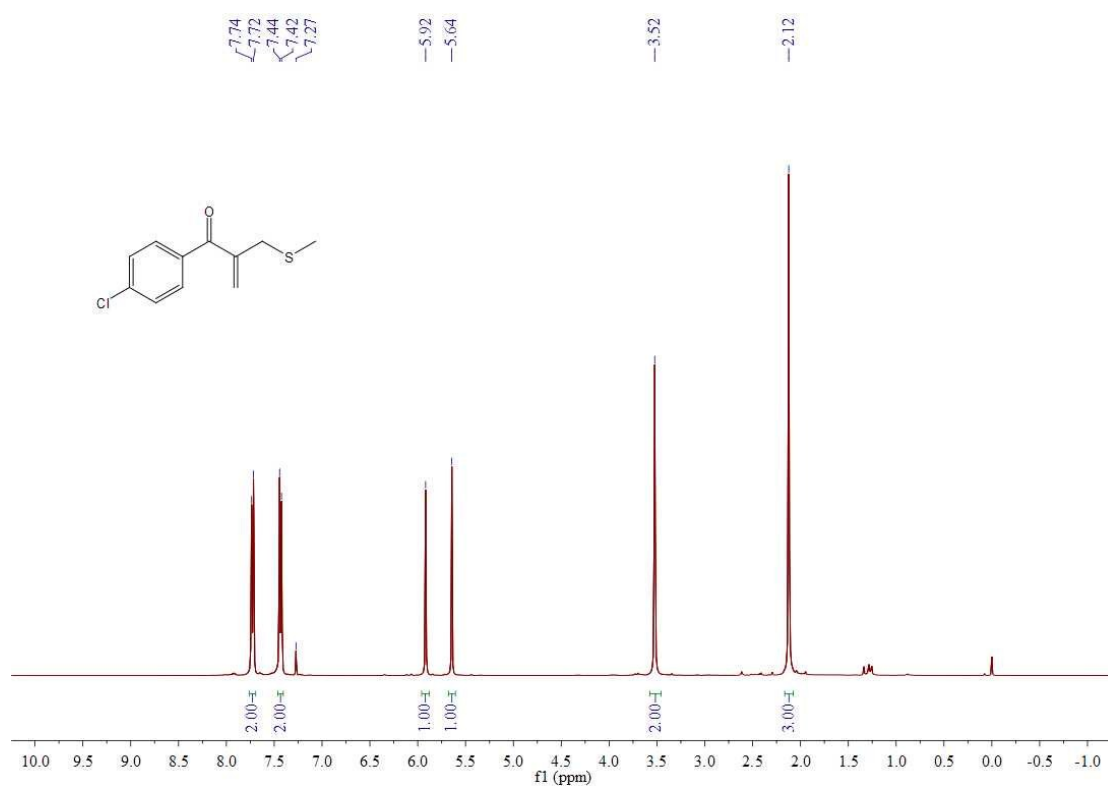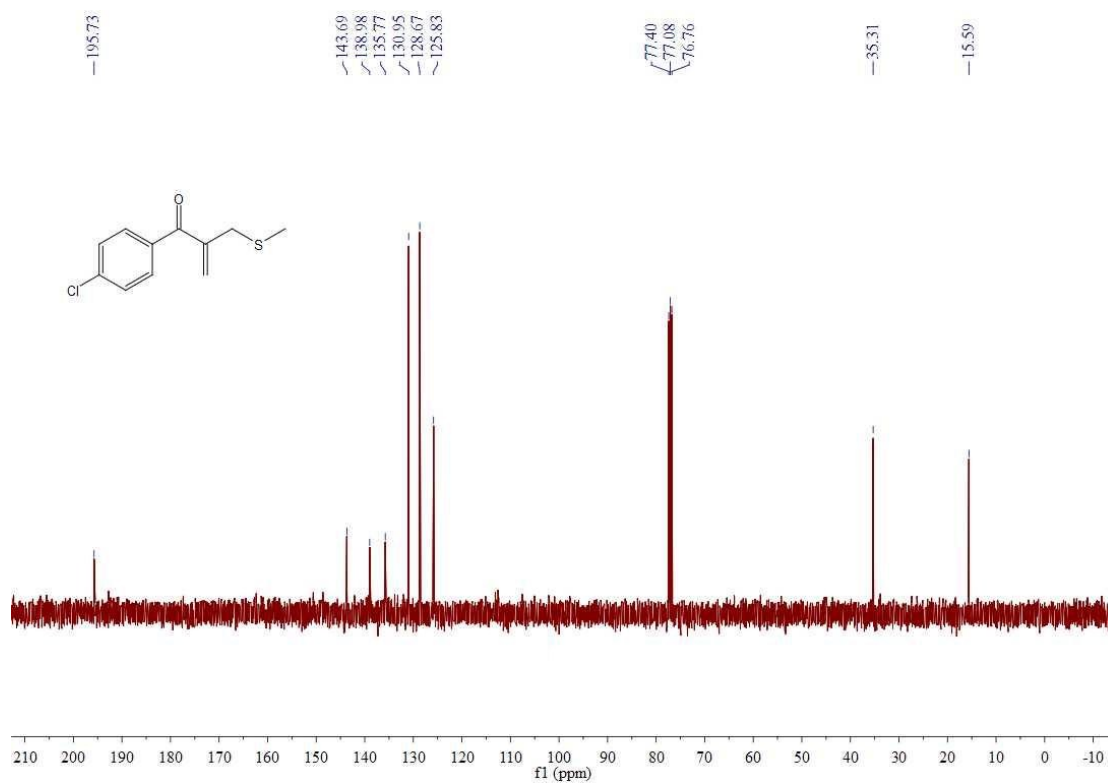

# Compound 3n

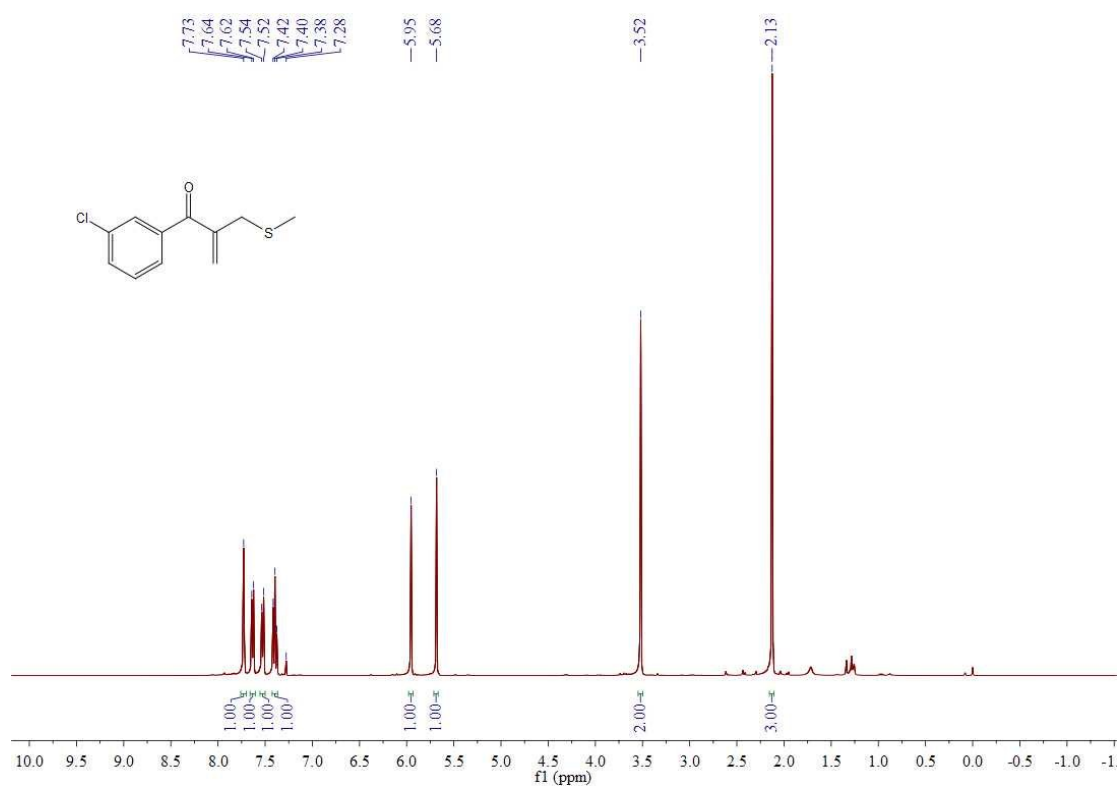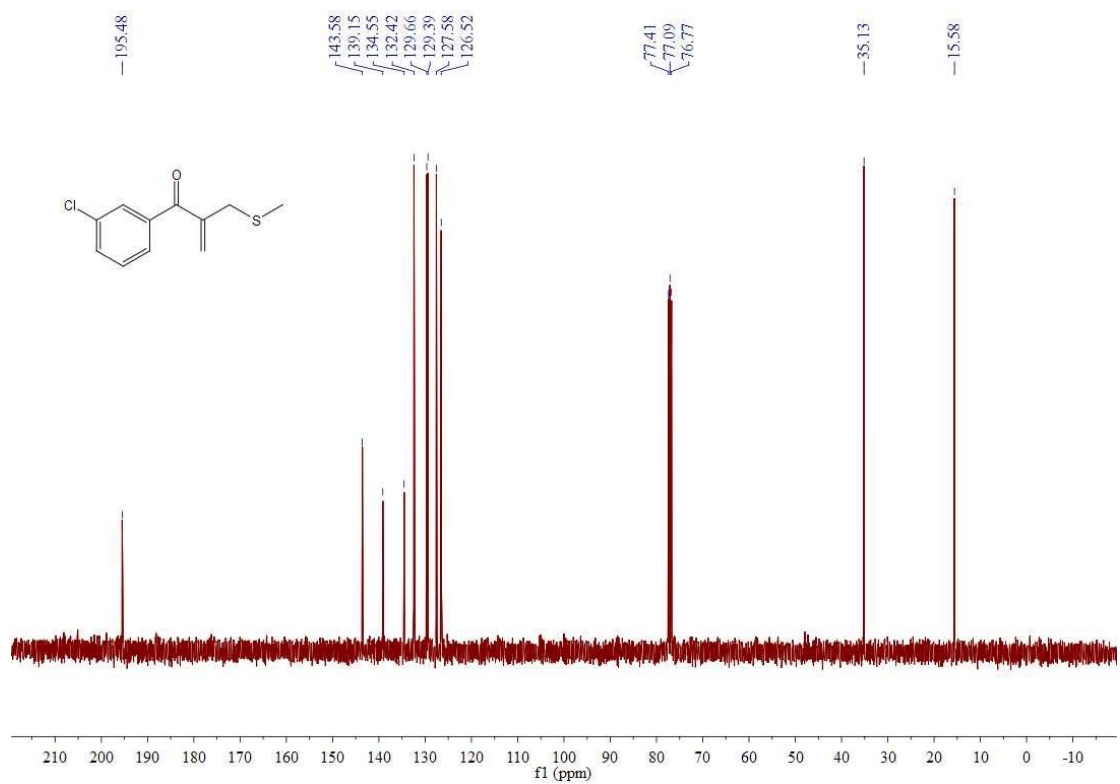



# Compound 3o

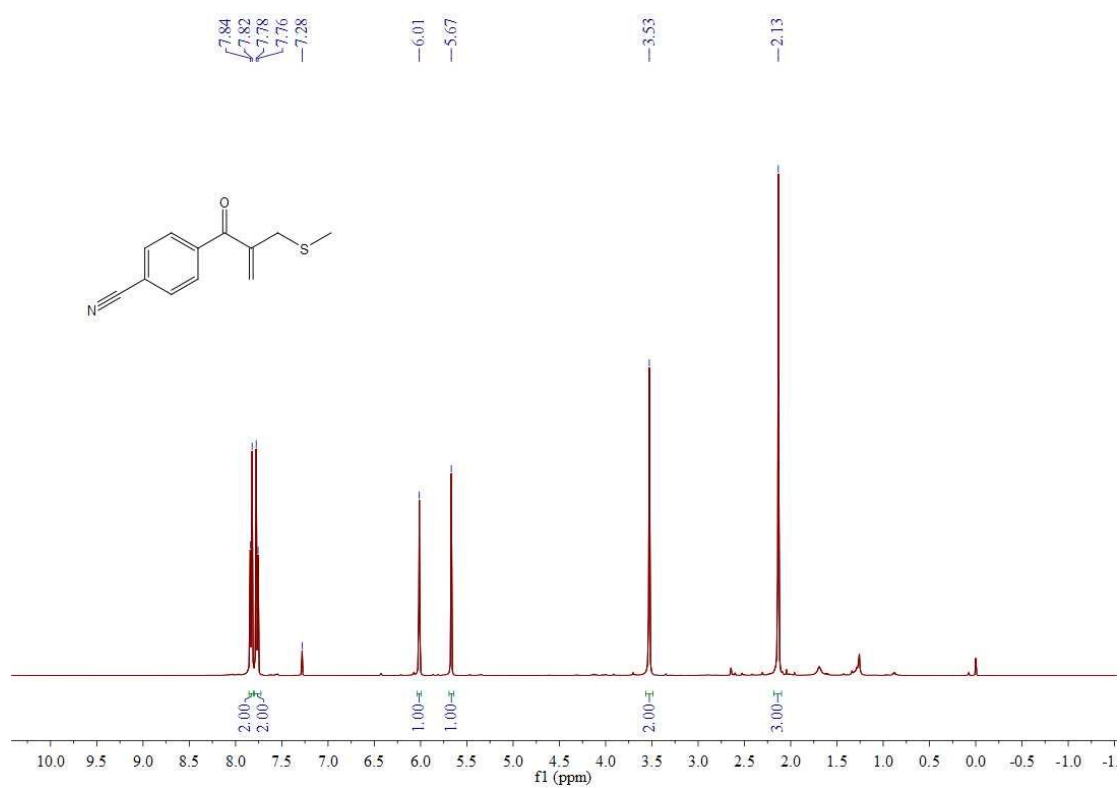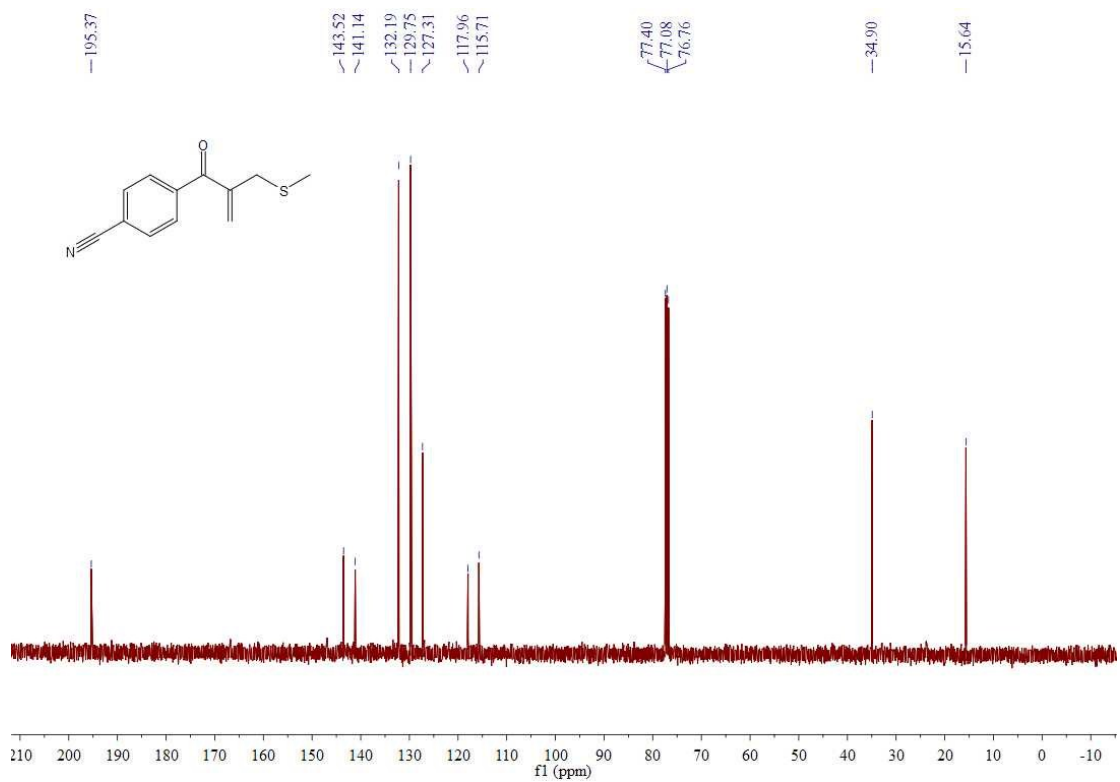

# Compound 3p

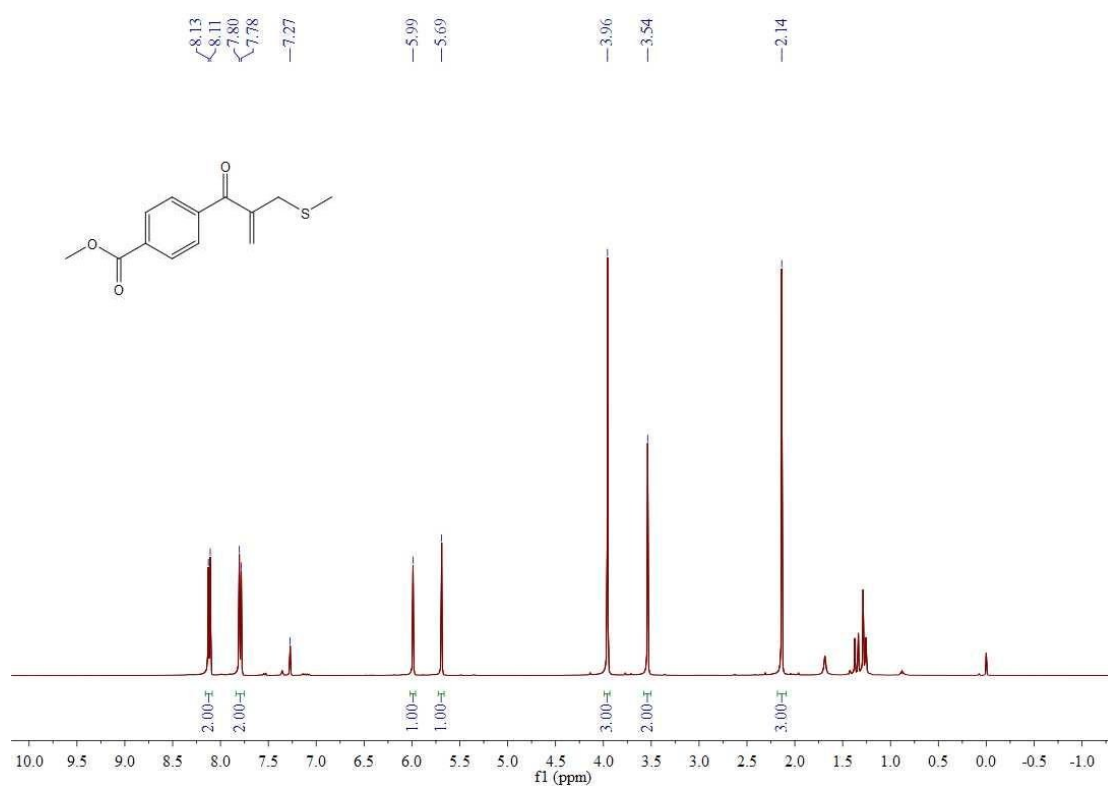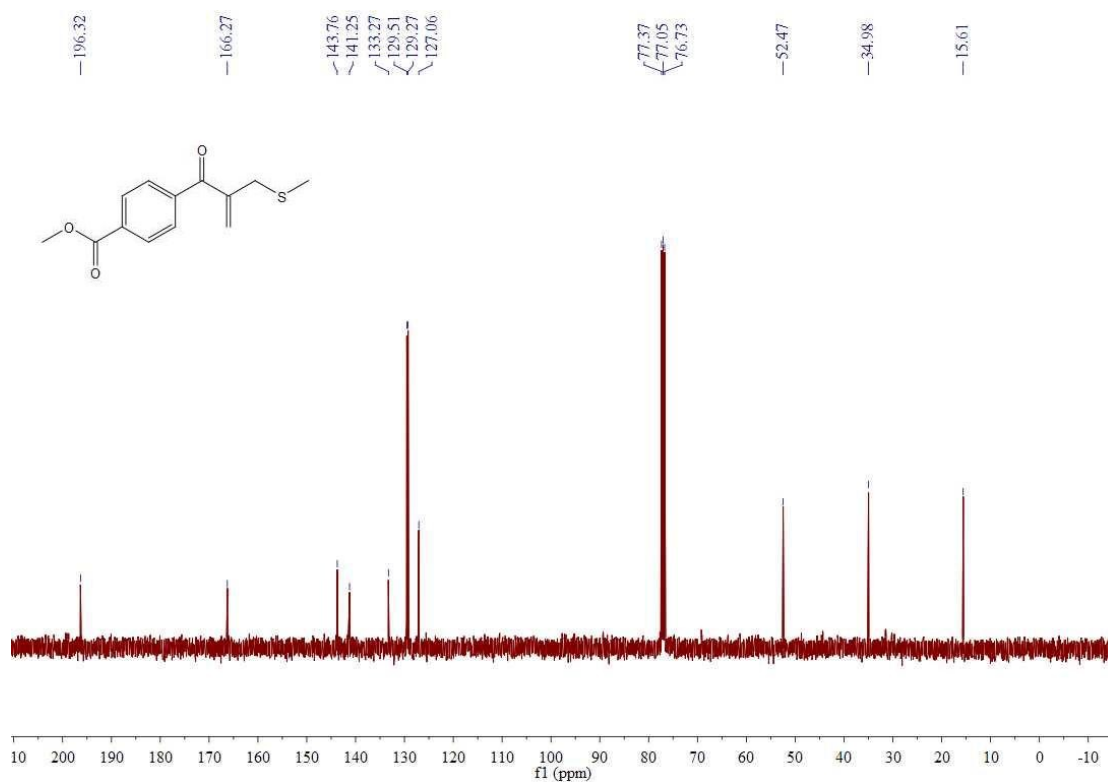

# Compound 3q

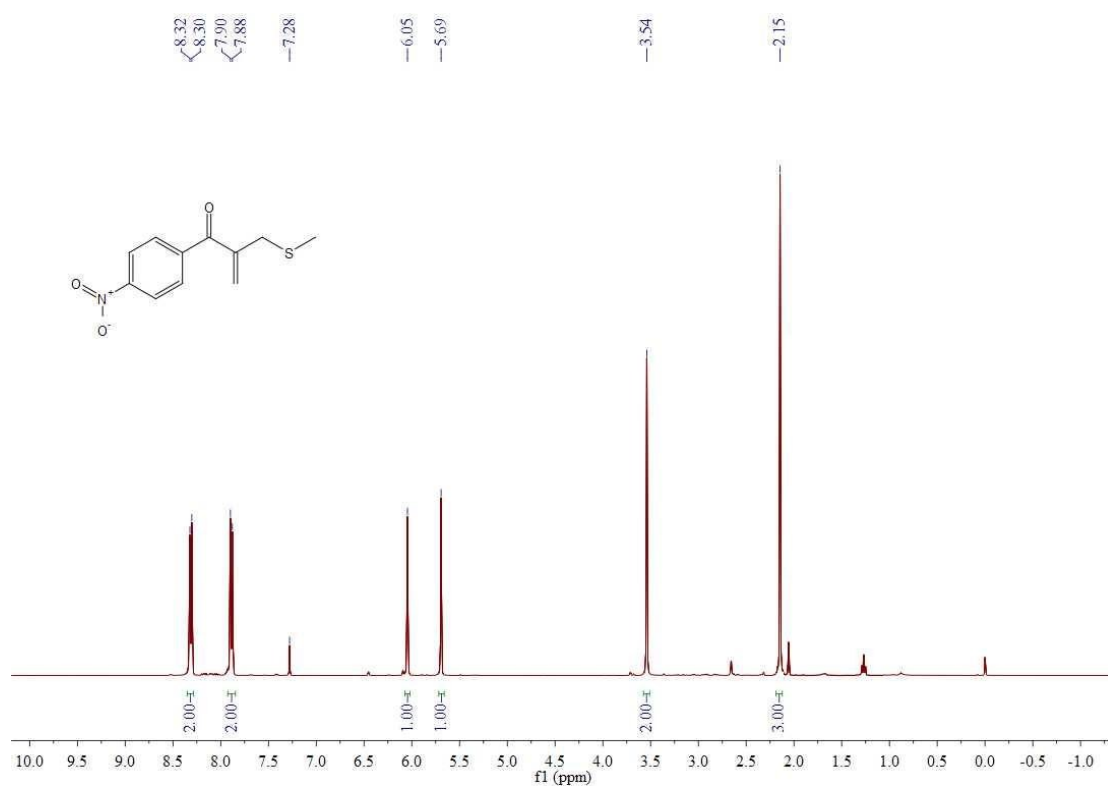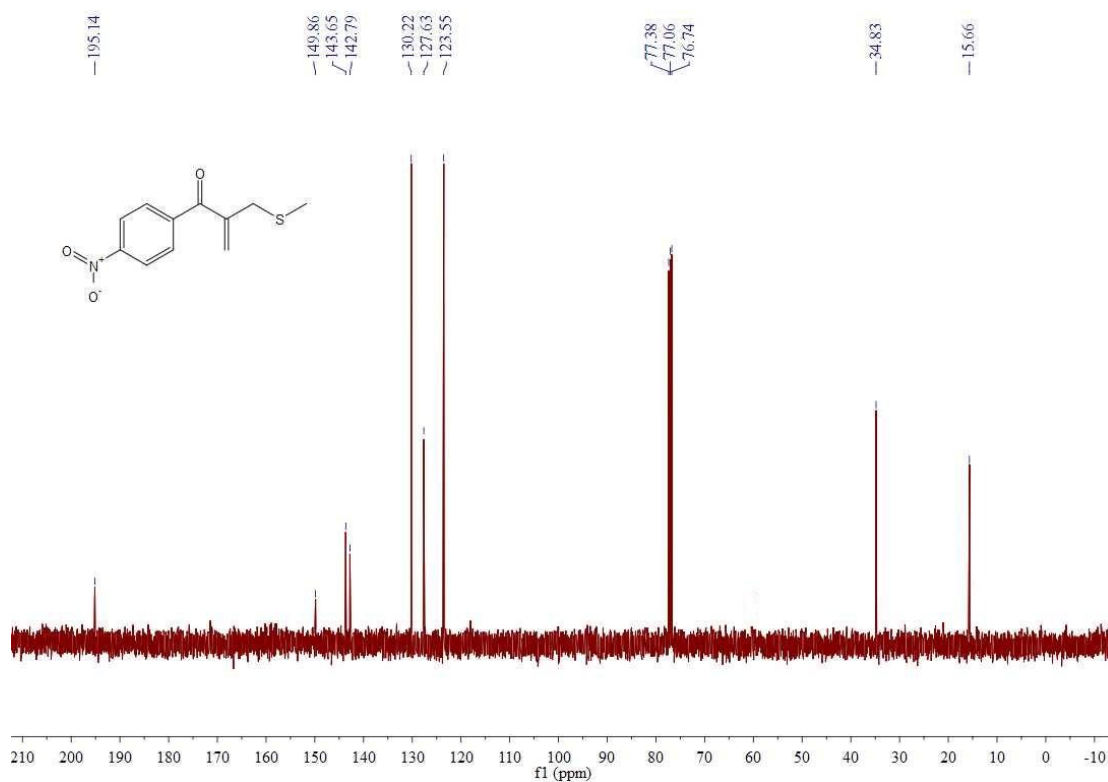

# Compound 3r

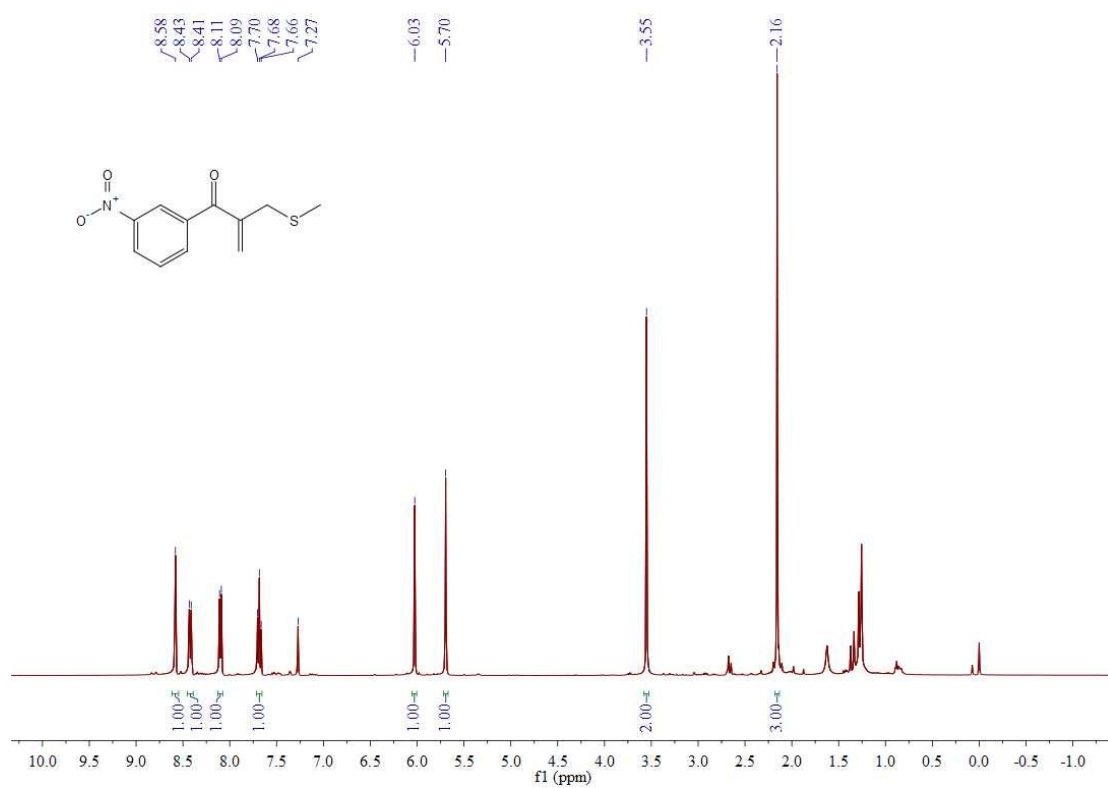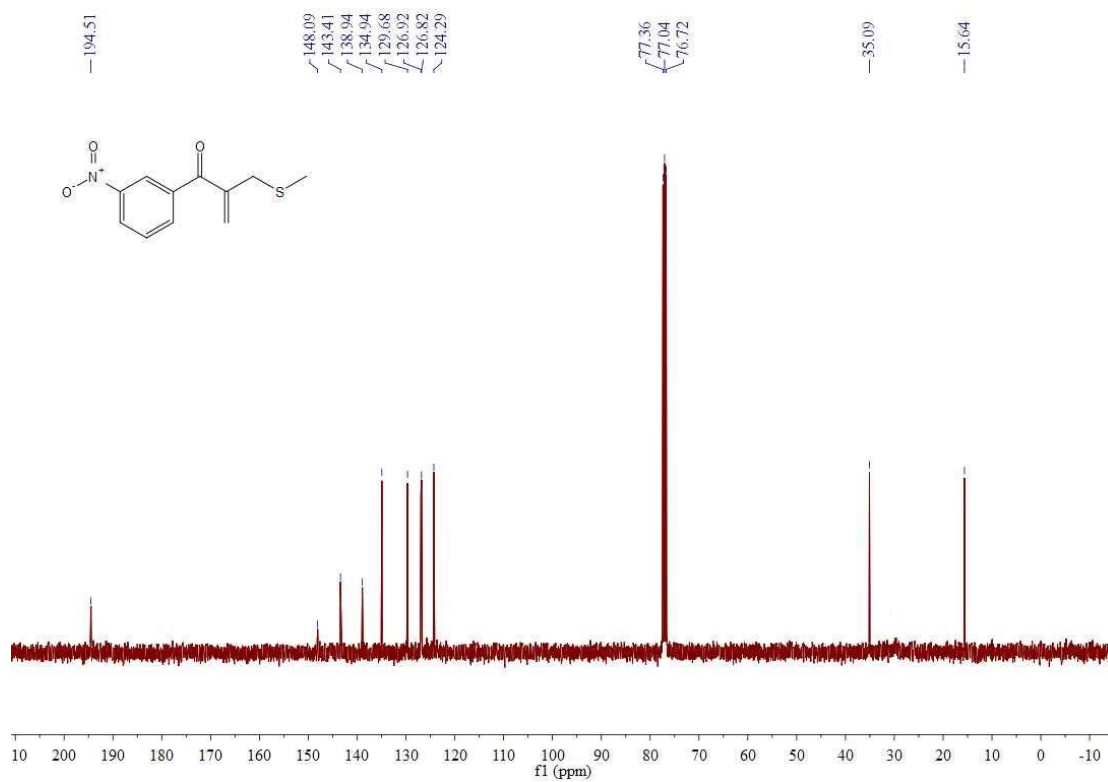

# Compound 3s

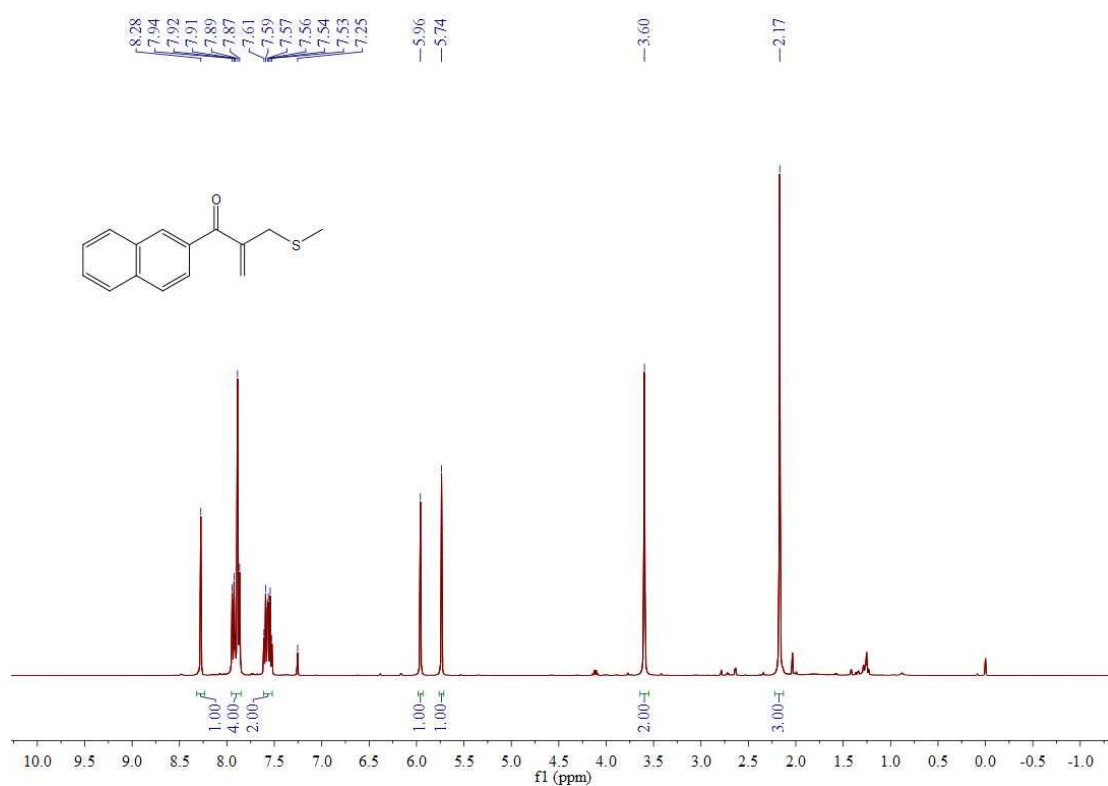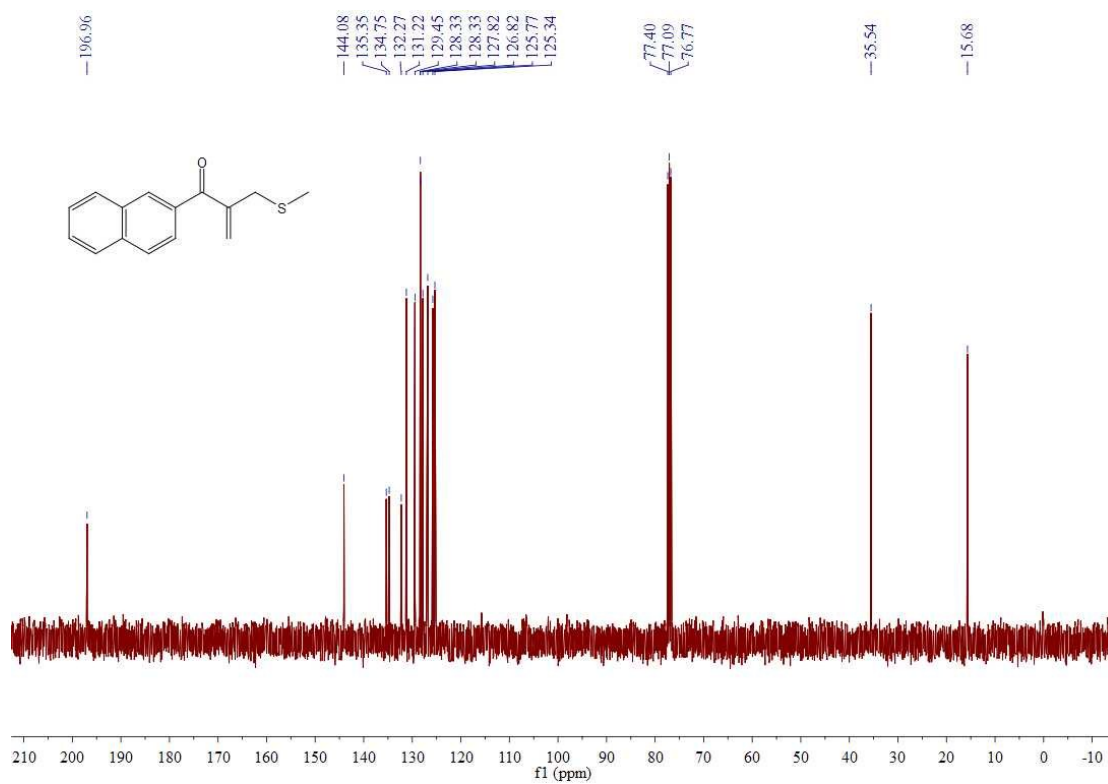

# Compound 3t

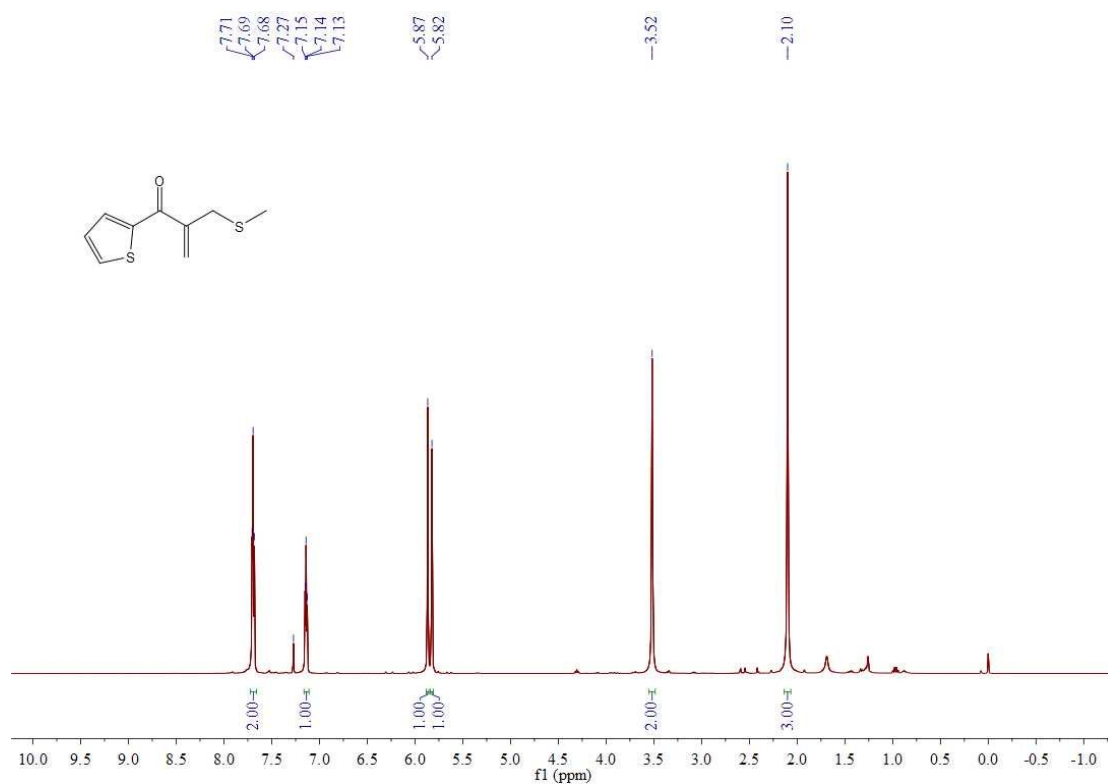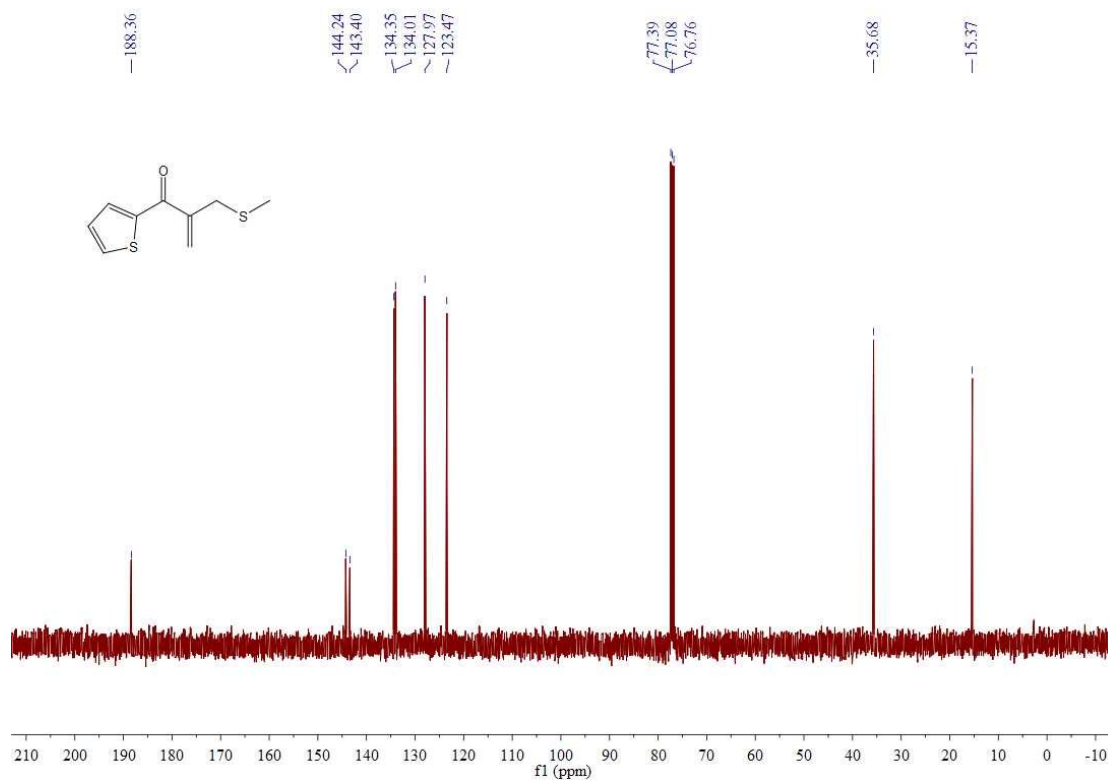

# Compound 3u

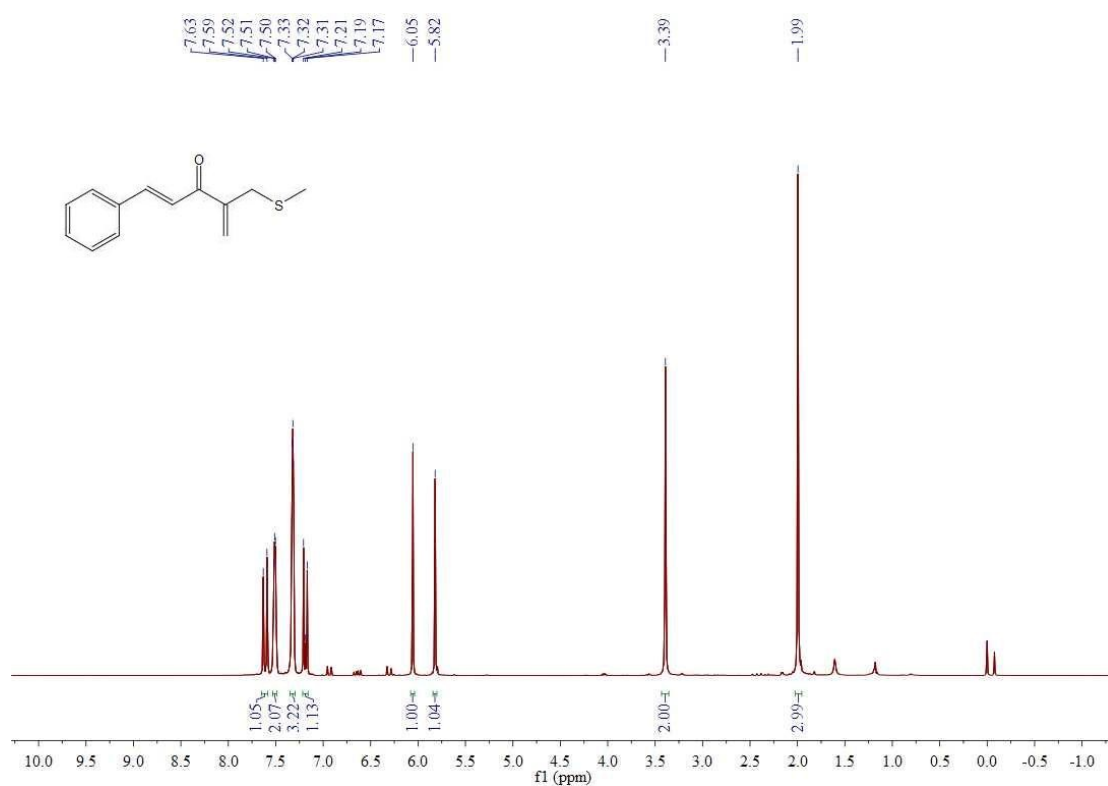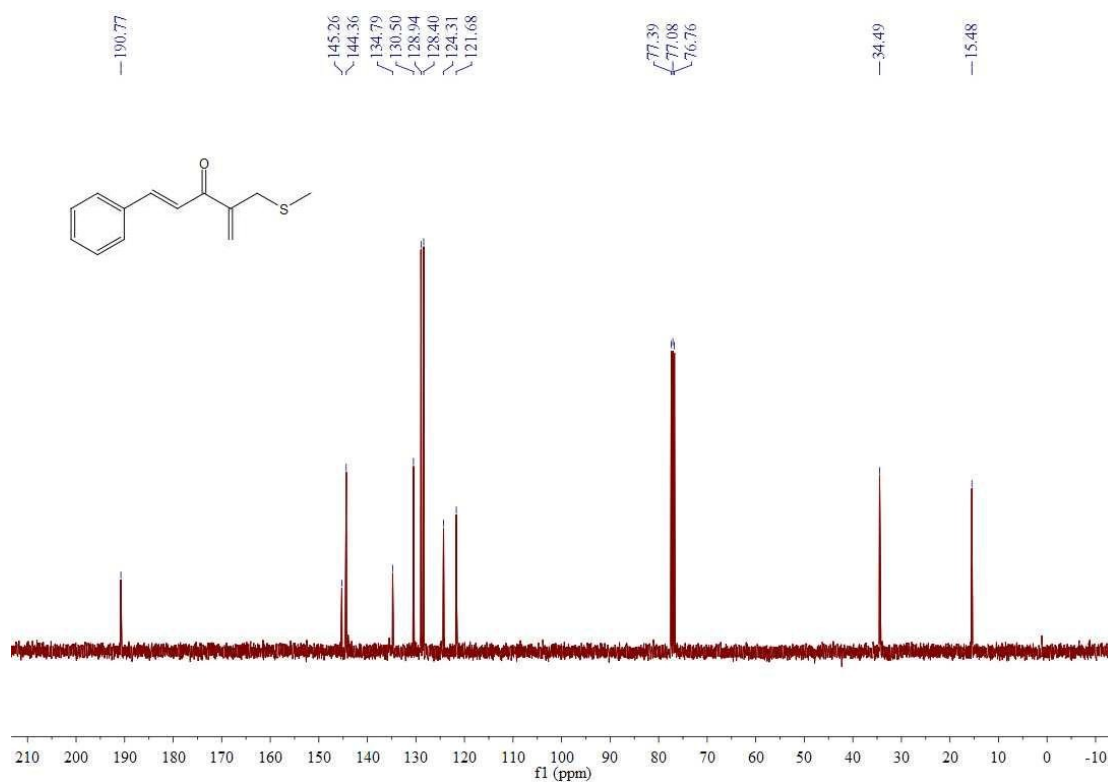

# Compound 3v

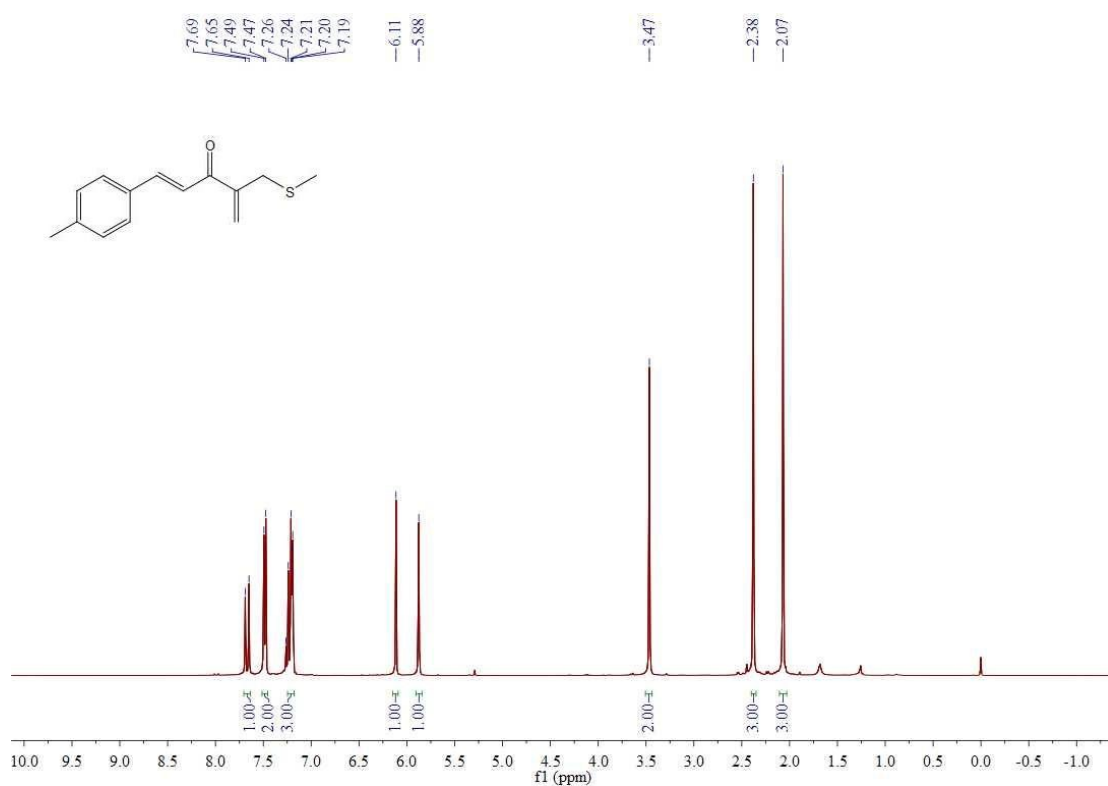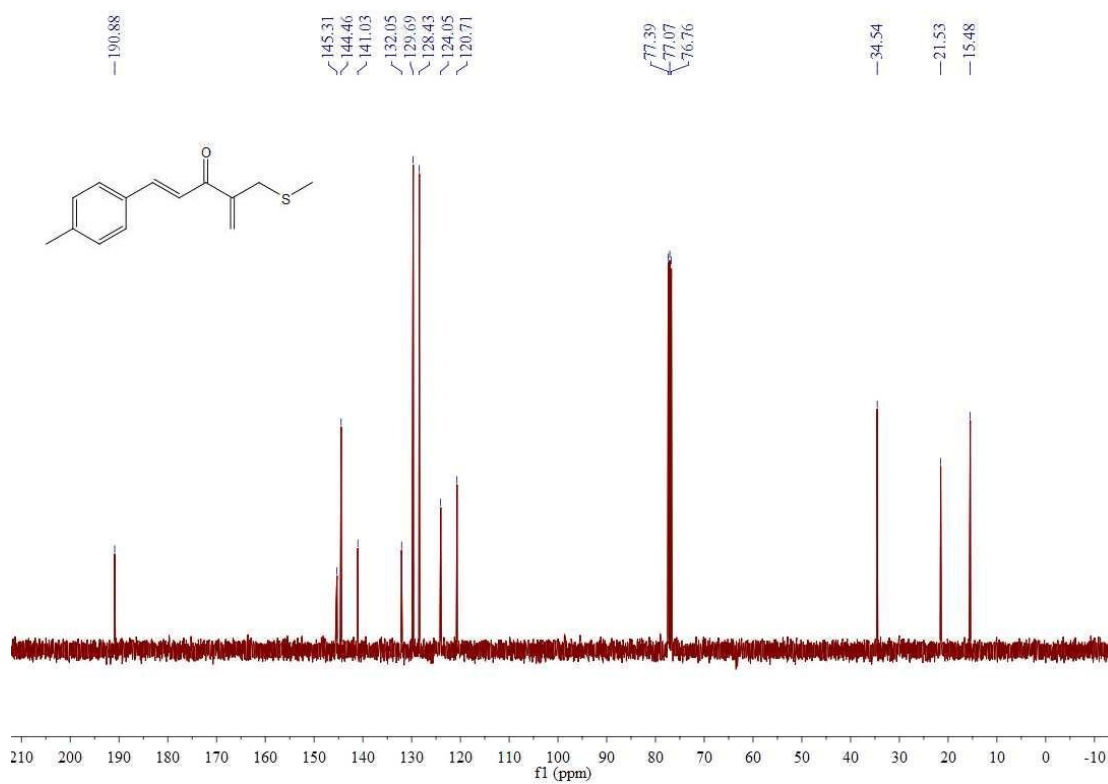



# Compound 4a

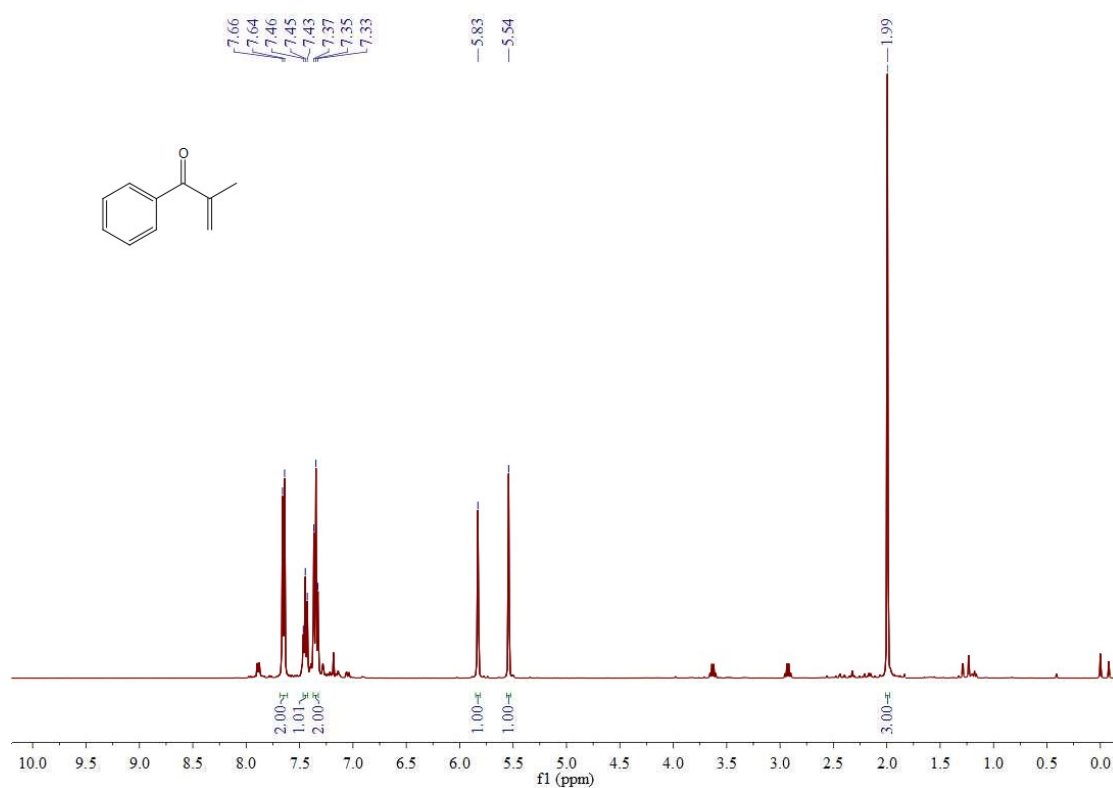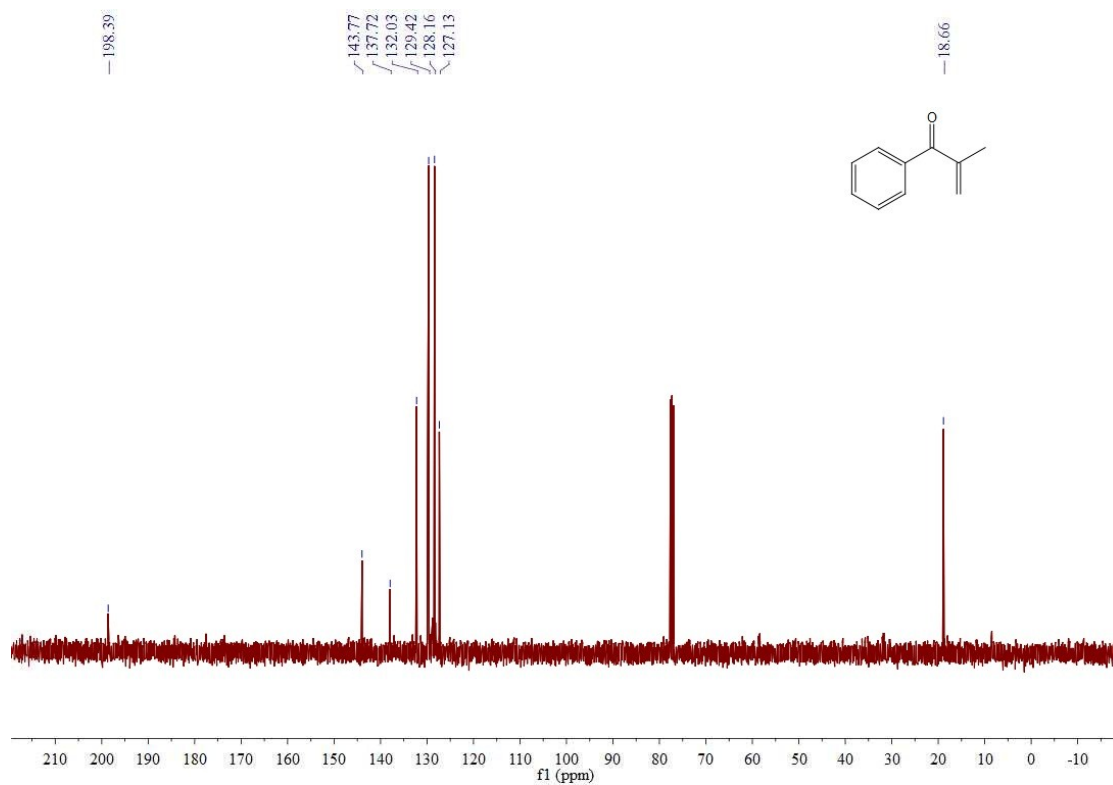

# Compound 4b

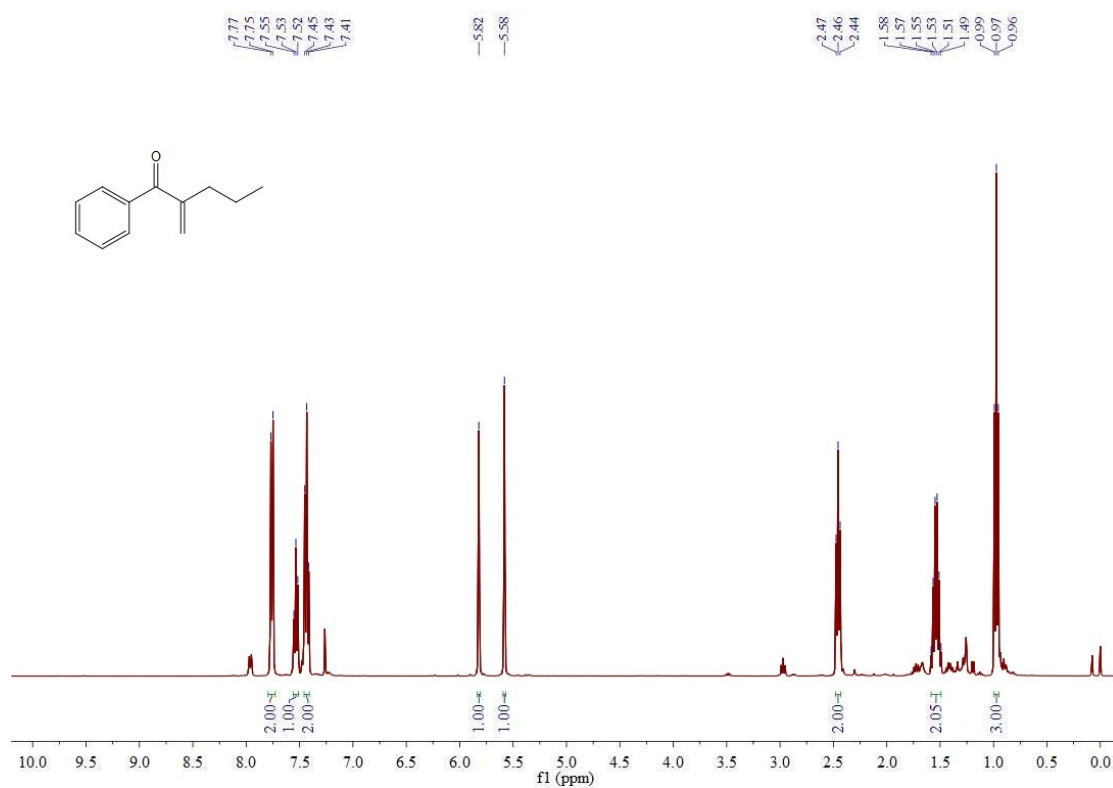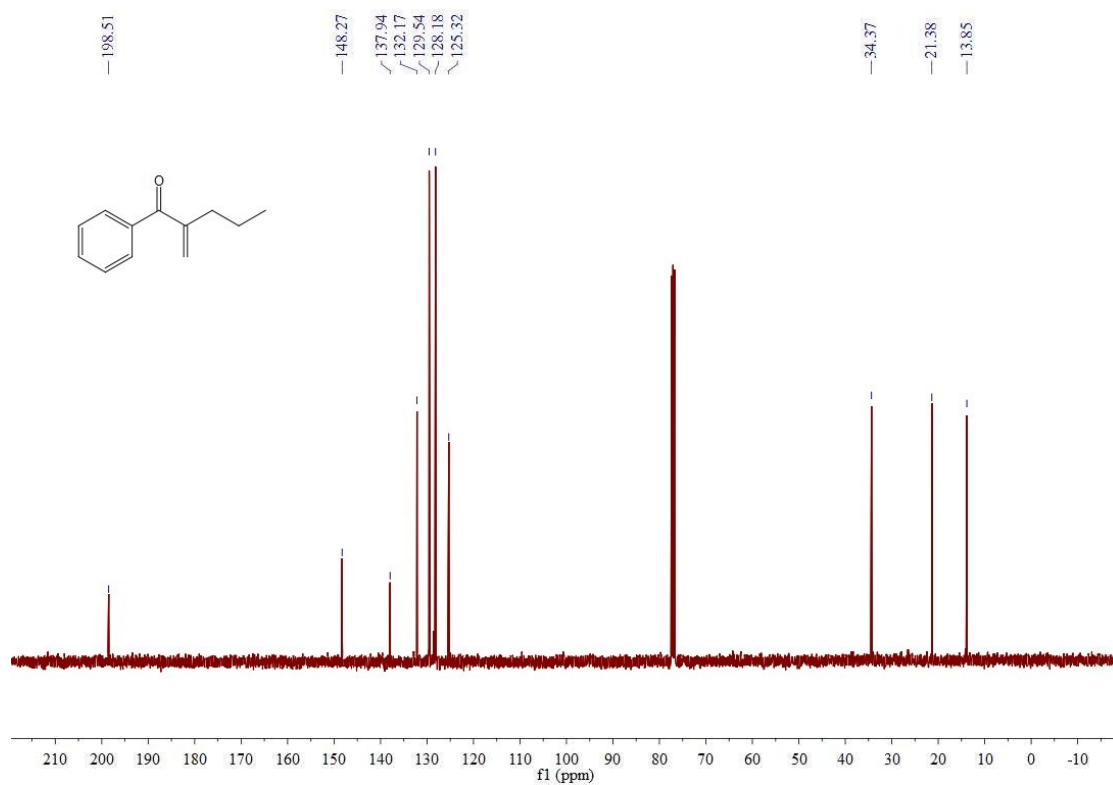

# Compound 3x

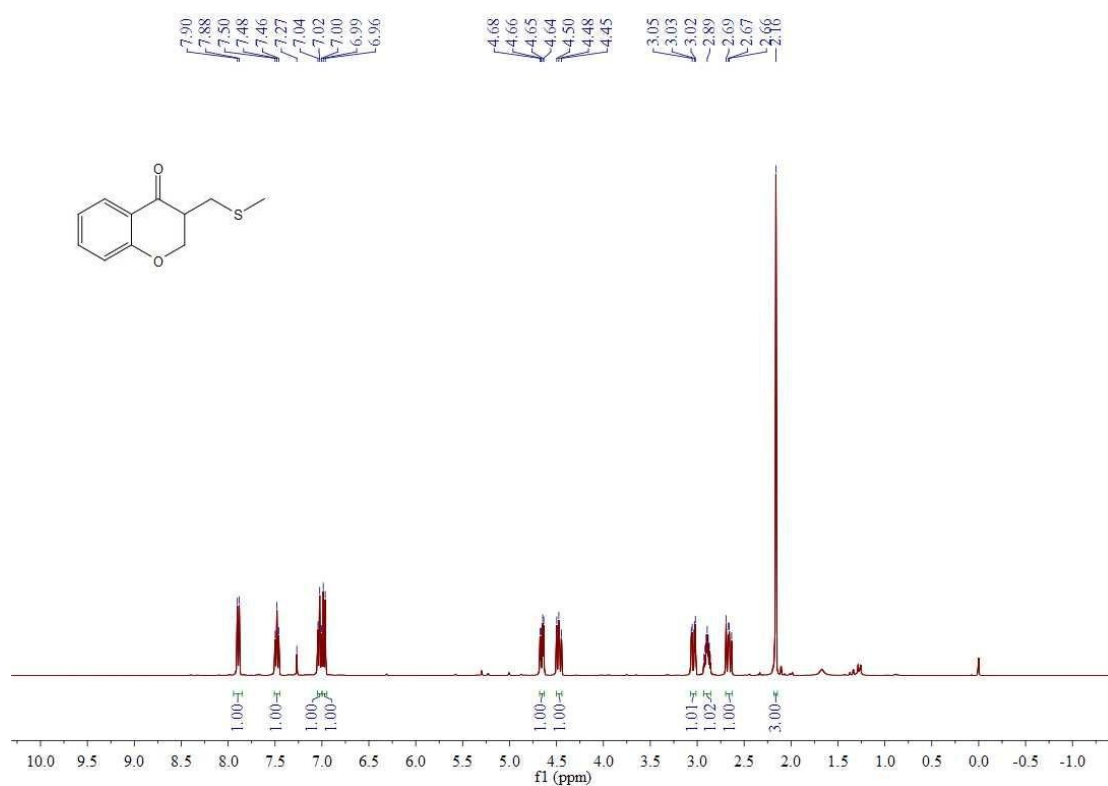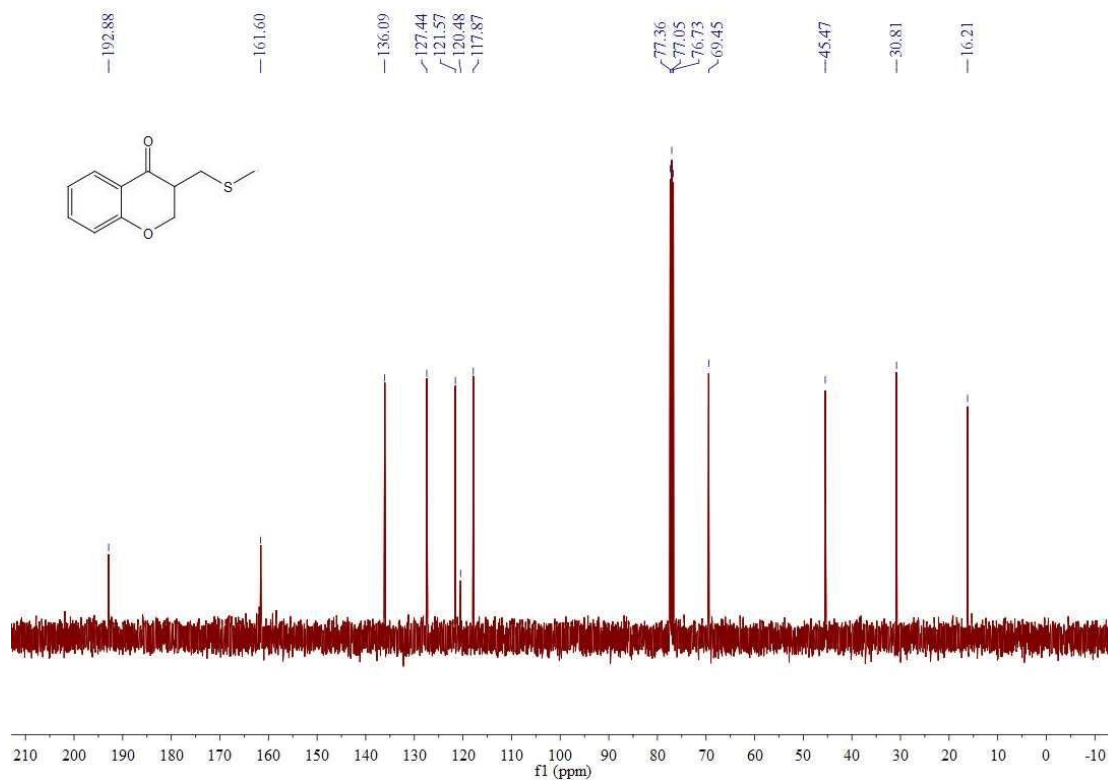

# Compound 3y

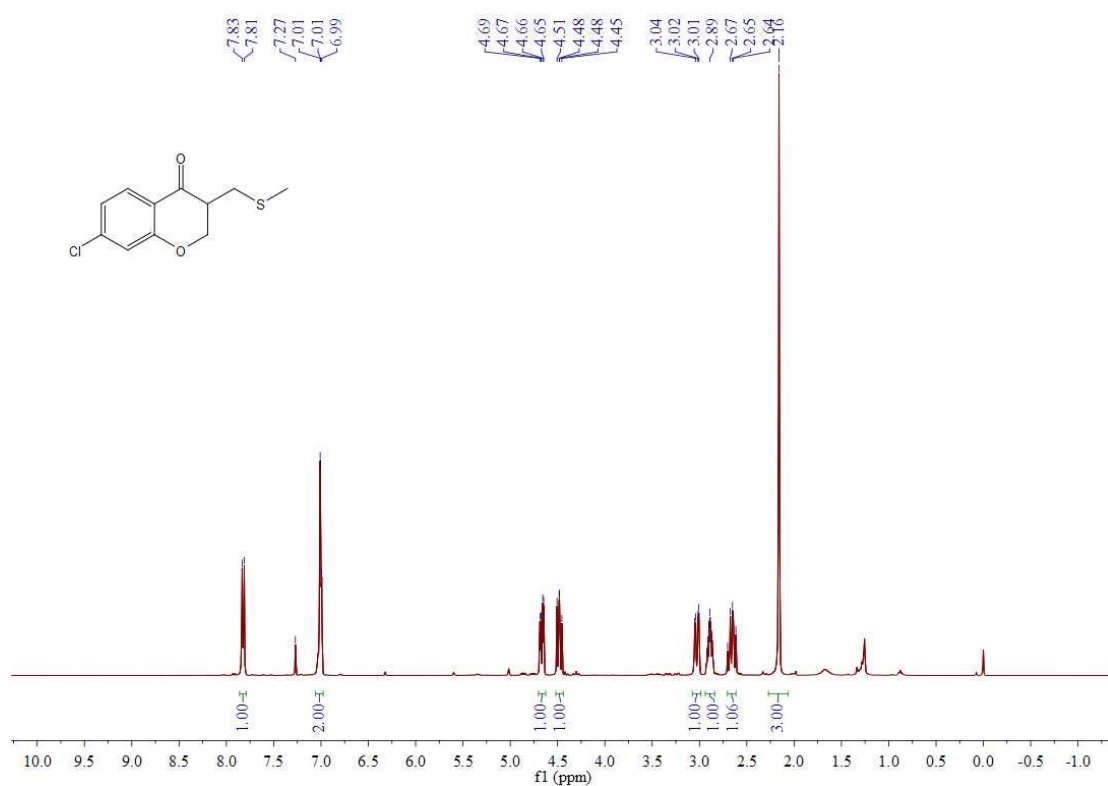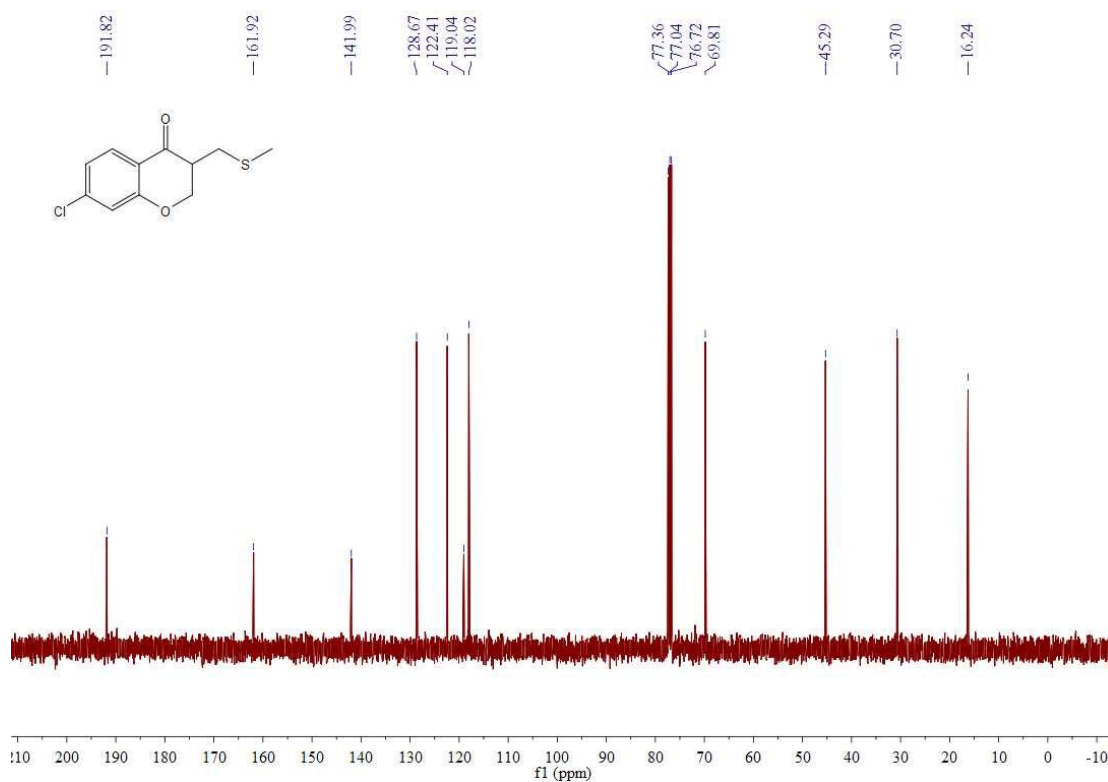

# Compound 3z

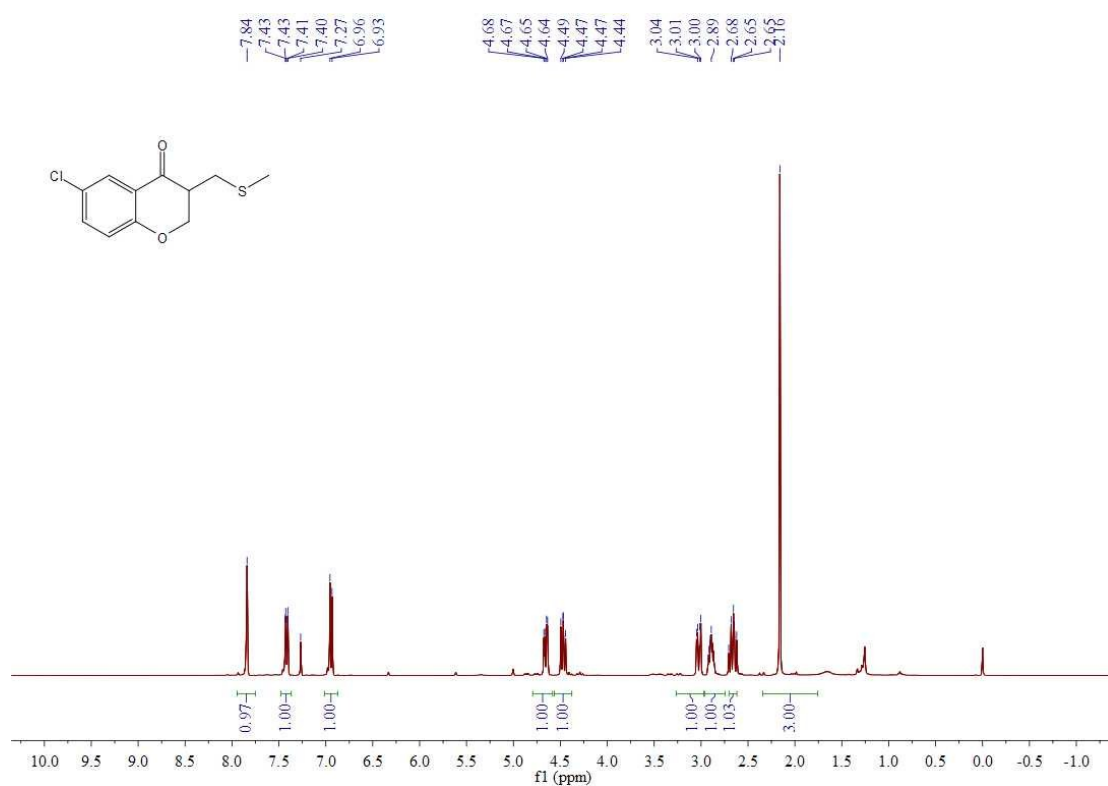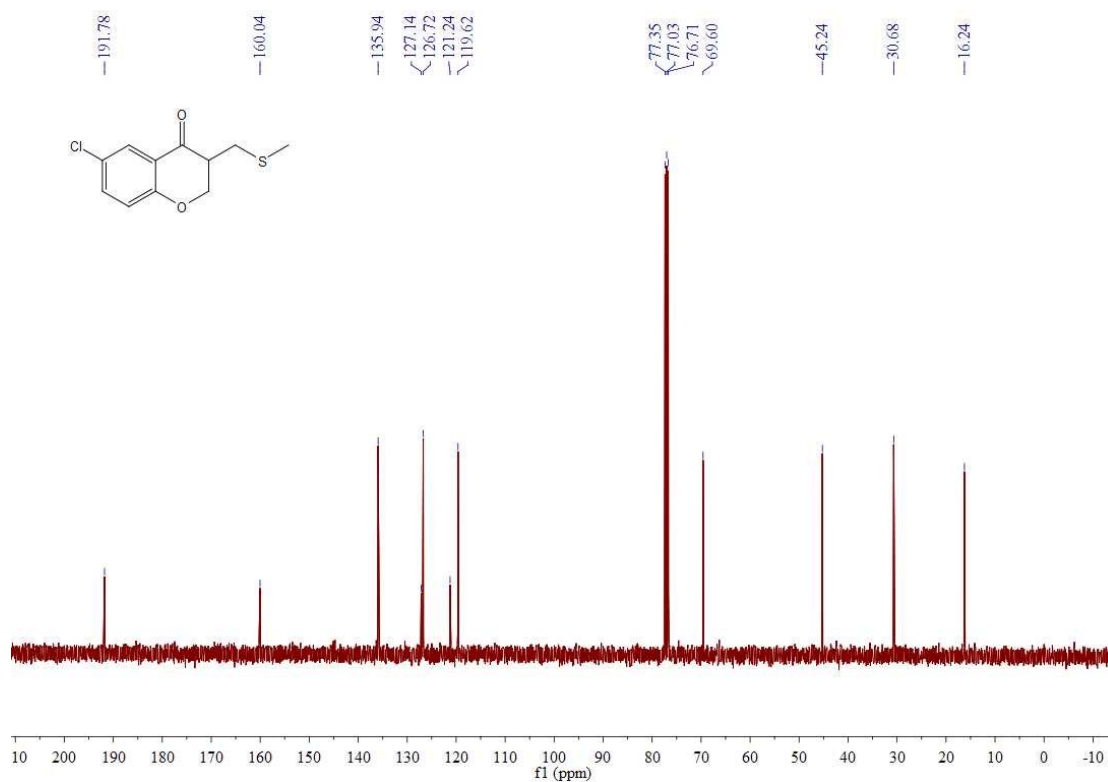

# Compound C

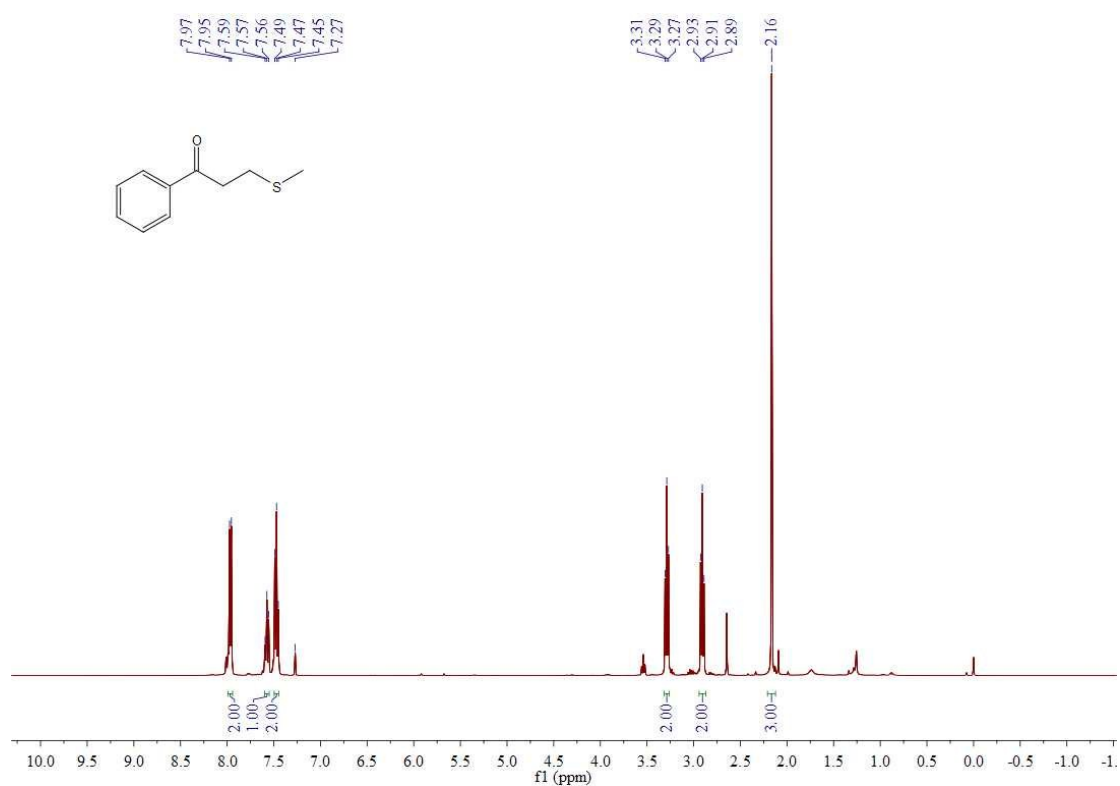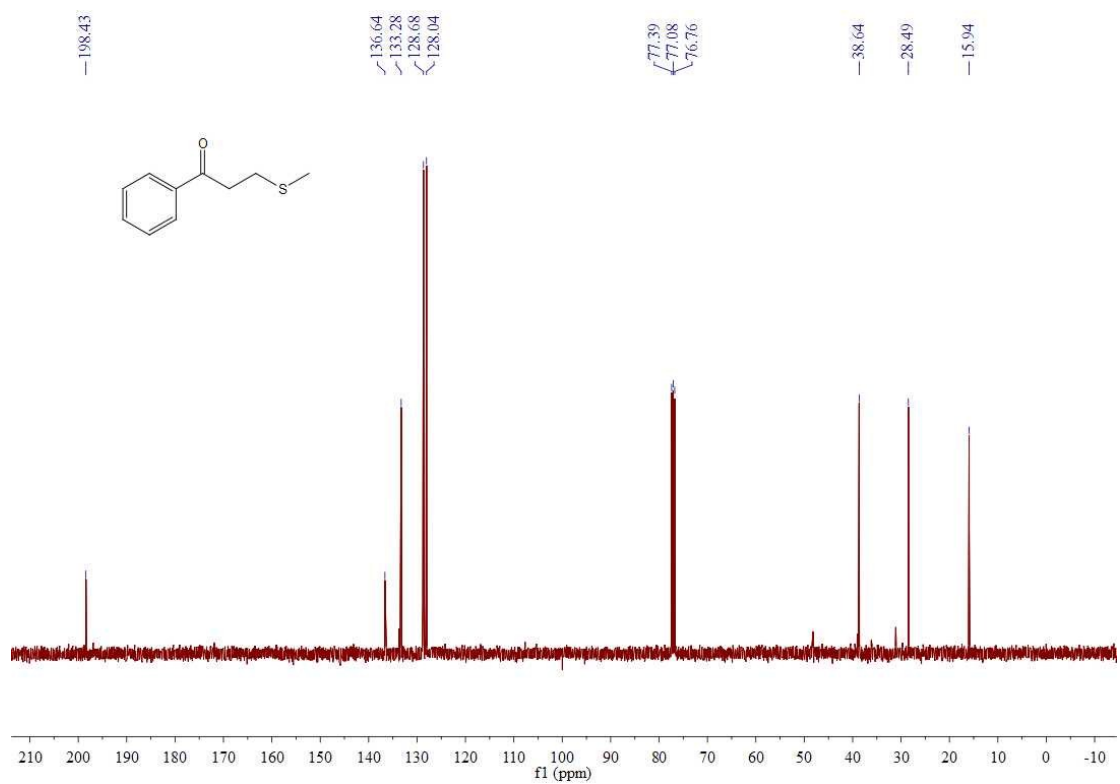

# Compound D

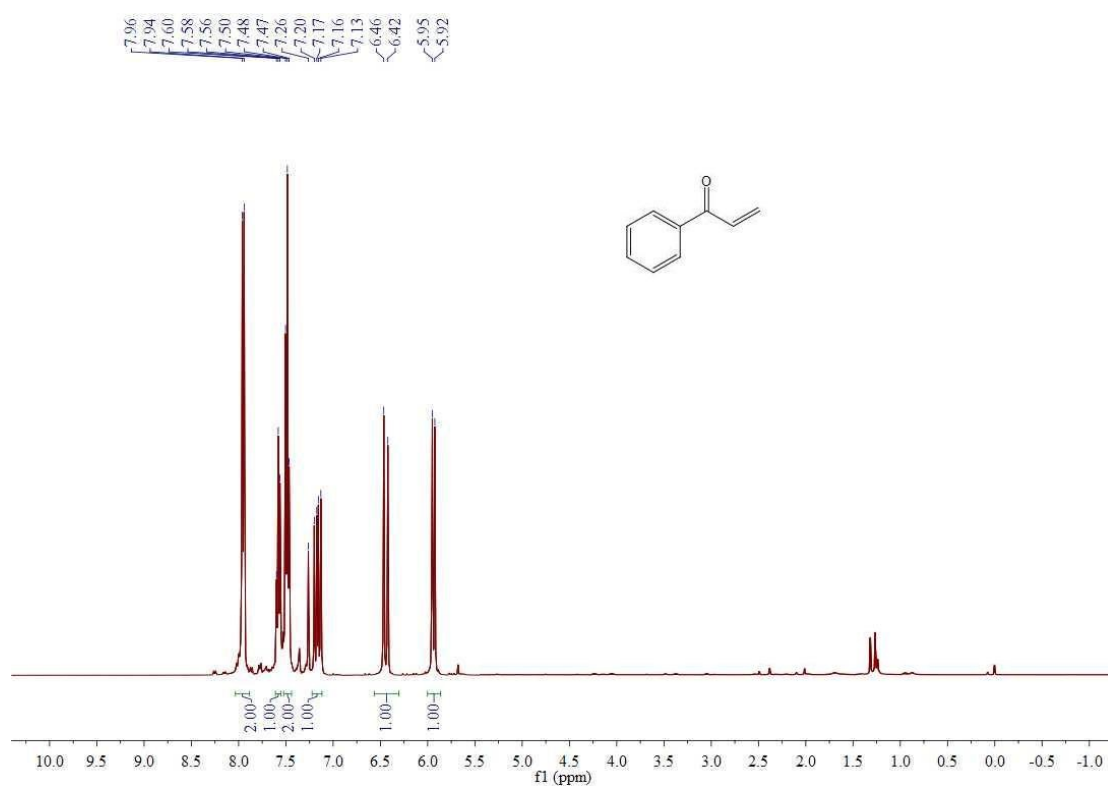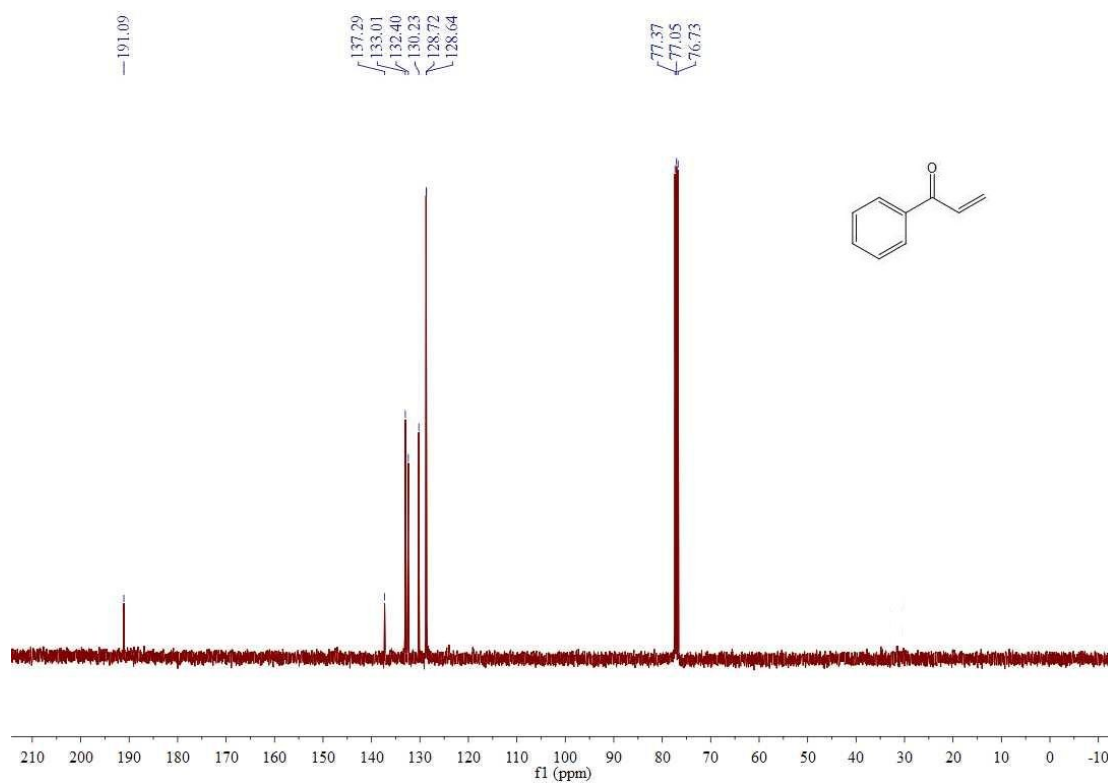

### Compound D-d<sub>2</sub>

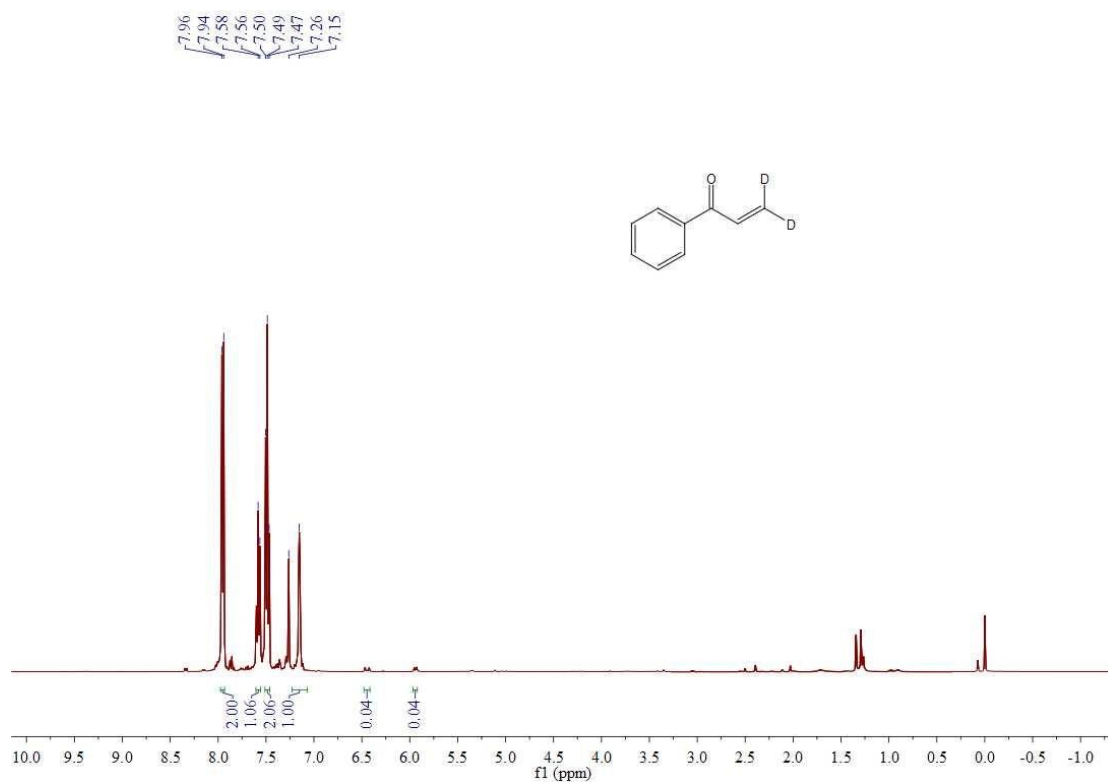

### Compound 3a-d<sub>7</sub>

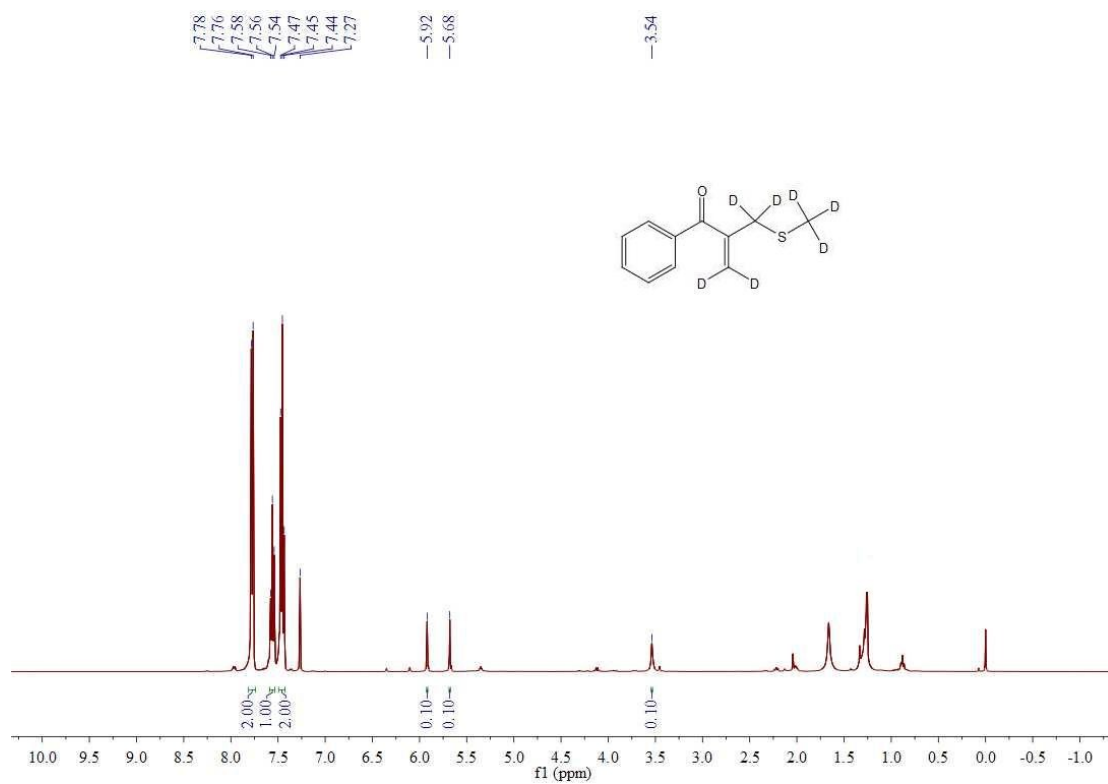

Supplement: c7cc01309d1.pdf [file c7cc01309d1.pdf]
